# Supplementary material for: From the parent phosphinidene–carbene adduct NHCPH to cationic P4-rings and P2-cycloaddition products
Source: Royal Society of Chemistry journal article supplement (doi:10.1039/c5dt03014e), 2015-09-24
Supplement: c5dt03014e1.pdf [file c5dt03014e1.pdf]

# From the Parent Phosphinidene-Carbene Adduct $\text{NHC}=\text{PH}$ to Cationic $\text{P}_4$ -Rings and $\text{P}_2$ -Cycloaddition Products

*Andreas Beil,<sup>a</sup> Robert J. Gilliard, Jr.,<sup>a</sup> Hansjörg Grützmacher<sup>a\*</sup>*

<sup>a</sup> Laboratory of Inorganic Chemistry, ETH Zürich, Vladimir-Prelog-Weg 1, 8093 Zürich, Switzerland.

E-mail: [hgruetzmacher@ethz.ch](mailto:hgruetzmacher@ethz.ch)

Supporting Information

|                                                                                                                                   |    |
|-----------------------------------------------------------------------------------------------------------------------------------|----|
| Preparations and Experiments                                                                                                      | 3  |
| 1. General Considerations                                                                                                         | 3  |
| 2. Carbene Stabilised Chlorodiphosphanes                                                                                          | 4  |
| Synthesis of DippNHC=PPClPh ( <b>2a</b> )                                                                                         | 4  |
| Synthesis of <sup>Dipp</sup> NHC=PPCl(N <sup>i</sup> Pr <sub>2</sub> ) ( <b>2b</b> )                                              | 4  |
| Synthesis of <sup>Dipp</sup> NHC=PPCl(NMe <sub>2</sub> ) ( <b>2c</b> )                                                            | 6  |
| 3. Cationic Derivatives                                                                                                           | 8  |
| Mass and NMR Data of the Postulated [2+2] Cycloadduct ( <b>3a</b> ) <sub>2</sub>                                                  | 8  |
| Synthesis of <sup>Dipp</sup> NHC=PP(N <sup>i</sup> Pr <sub>2</sub> )(GaCl <sub>4</sub> ) ( <b>3b</b> )                            | 9  |
| Synthesis of ( <sup>Dipp</sup> NHC=PPNMe <sub>2</sub> ) <sub>2</sub> (GaCl <sub>4</sub> ) <sub>2</sub> ( <b>3c</b> ) <sub>2</sub> | 10 |
| Cycloreversion Reaction of <b>3c</b> <sub>2</sub> upon Heating                                                                    | 11 |
| 4. Cycloadducts with 2,3-Dimethylbuta-1,3-diene                                                                                   | 12 |
| Synthesis of Cycloadduct <b>4a</b>                                                                                                | 12 |
| Synthesis of Cycloadduct <b>4b</b>                                                                                                | 13 |
| Synthesis of Cycloadduct <b>4c</b>                                                                                                | 15 |
| 5. Cycloadducts with Cyclopentadiene                                                                                              | 16 |
| Synthesis of Cycloadduct <b>5a</b>                                                                                                | 16 |
| The Reaction of <b>3b</b> with Cyclopentadiene – Proof of Reversibility                                                           | 18 |
| Synthesis of Cycloadduct <b>5c</b>                                                                                                | 20 |
| Crystallographic Tables                                                                                                           | 22 |
| References                                                                                                                        | 32 |

## Preparations and Experiments

### 1. General Considerations

Starting material  $^{\text{Dipp}}\text{NHC}=\text{PH}$  **1**<sup>1</sup> was synthesised from sodium phosphaehtynolate<sup>2, 3</sup> and 1,3-bis(2,6-diisopropylphenyl)-1*H*-imidazol-3-ium chloride<sup>4</sup> according to literature procedures. Dichloro(diisopropylamino)phosphane<sup>5</sup> and chlorobis(dimethylamino)phosphane<sup>6</sup> was synthesised as described in literature. Precursors described herein (**2a-c**) have been applied as obtained from hexane extraction of crude material without further purification. All other reagents and solvents have been purchased from commercial suppliers. 2,3-Dimethylbuta-1,3-diene was distilled from  $\text{NaBH}_4$  and degassed. Cyclopentadiene was distilled from dicyclopentadiene over copper powder and stored over molecular sieve 3 Å at -30 °C. Solvents have been degassed and purified using an INNOVATIVE TECHNOLOGIES PURE SOLV solvent purification system prior to use. All syntheses and manipulations have been performed in argon under the exclusion of air and moisture using standard SCHLENK technique or a M. BRAUN glovebox.

Single crystal X-ray diffraction measurements were performed on BRUKER SMART APEX, SMART APEX2 or D8 VENTURE systems. Data analysis were performed using BRUKER APEX2 and OLEX2 1.2 software.<sup>7</sup> CCDC numbers (1415566-1415574) are listed in the crystallographic tables. Powder diffraction measurements were performed on a STOE system. From single crystal data, powder patterns have been calculated using MERCURY 3.3 and plotted together with the measured data using ORIGIN PRO 9.1 in order to prove the identity of the bulk product. Due to the extreme sensitivity of these compounds to oxidation, we were only able to obtain analytical pure material of **2a**.

NMR spectra have been recorded on BRUKER 250, 300, 400 and 500 MHz spectrometers. Deuterated solvents have been degassed and dried prior to use. Chemical shifts are reported in ppm relative to  $\text{SiMe}_4$  (for  $^1\text{H}$  and  $^{13}\text{C}$ ) and 85 % phosphoric acid (for  $^{31}\text{P}$ ) using the solvent deuterium signals as internal standards. Signal multiplicities are described as singlet (s), doublet (d), triplet (t), quartet (q), septet (sept), multiplet (m) and broad singlet (bs). For  $^{13}\text{C}$  signals overlapping with solvent residual signals, shifts have been taken from DEPT 135 spectra. Data analysis has been carried out using BRUKER TOPSPIN 3.1.

MALDI-TOF mass spectra were recorded at the ETH Zürich MS department on a BRUKER ULTRAFLEX II system. Elemental analyses have been carried out at the ETH Zürich Mikrolabor.

## 2. Carbene Stabilised Chlorodiphosphanes

### Synthesis of DippNHC=PPClPh (**2a**)

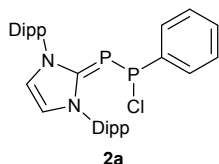

Dichlorophenylphosphane (63.8 mg, 0.36 mmol, 1 eq.) is dissolved in 0.2 mL of dry THF. A solution of **1** (149.7 mg, 0.36 mmol, 1 eq.) in 2 mL of dry THF and DABCO (41.3 mg, 0.37 mmol, 1.03 eq.) in 1 mL of dry THF are added. The colour changes from pale to deep yellow and a colourless solid precipitates immediately. The reaction mixture is filtered over a PTFE syringe filter and evaporated *in vacuo*. The obtained orange foam is extracted 6 × with 10 mL of hexane. Evaporation of the combined yellow hexane fractions yields DippNHC=PPClPh (**2a**) as yellow solid (74.3 mg, 0.13 mmol, 36 %). Single crystals suitable for X-ray crystallography have been obtained by slow evaporation of a hexane solution of **2a**. A minimum amount of analytically pure material has been obtained from hexane at -30 °C.

**<sup>1</sup>H NMR** (500 MHz, THF-*d*<sub>8</sub>, 298 K)  $\delta$  = 7.48 (t,  $J_{\text{HH}}$  = 7.8 Hz, 2H, p-Dipp), 7.45-7.40 (m, 2H, Ph), 7.38 (s, 2H, CH=CH), 7.33 (m, 4H, m-Dipp), 7.09 (t  $J_{\text{HH}}$  = 7.5 Hz, 2H, Ph), 7.07-7.02 (m, 1H, Ph), 2.93 (sept.,  $J_{\text{HH}}$  = 7.0 Hz, 2H, Dipp-CH(CH<sub>3</sub>)<sub>2</sub>), 2.85 (sept.,  $J_{\text{HH}}$  = 6.9 Hz, 2H, Dipp-CH(CH<sub>3</sub>)<sub>2</sub>), 1.41 (d,  $J_{\text{HH}}$  = 6.9 Hz, 12H, Dipp-CH<sub>3</sub>), 1.23 (d,  $J_{\text{HH}}$  = 6.9 Hz, 12H, Dipp-CH<sub>3</sub>); **<sup>13</sup>C{<sup>1</sup>H} NMR** (125.8 MHz, THF-*d*<sub>8</sub>, 298 K)  $\delta$  = 169.9 (dd,  $J_{\text{PC}}$  = 119.0 Hz,  $J_{\text{PC}}$  = 20.8 Hz, C<sub>carbene</sub>), 146.18 (d,  $J$  = 33.9 Hz, ipso-Dipp), 124.0 (m-Dipp), 123.1 (d,  $J_{\text{PC}}$  = 3.6 Hz, CH=CH), 29.0 (Dipp-CH(CH<sub>3</sub>)<sub>2</sub>), 28.9 (Dipp-CH(CH<sub>3</sub>)<sub>2</sub>), 24.2 (CH<sub>3</sub>), 24.1 (CH<sub>3</sub>), 22.4 (CH<sub>3</sub>), 22.2 (CH<sub>3</sub>); **<sup>31</sup>P{<sup>1</sup>H} NMR** (202.5 MHz, THF-*d*<sub>8</sub>, 298 K)  $\delta$  = 157.6 (d,  $J_{\text{PP}}$  = 374.5 Hz), -17.3 (d,  $J_{\text{PP}}$  = 377.9 Hz); **EA** calc. for C<sub>33</sub>H<sub>41</sub>N<sub>2</sub>P<sub>2</sub>Cl: C 70.39, H 7.34, N 4.97, found: C 70.67, H 7.57, N 4.95

### Synthesis of DippNHC=PPCl(N<sup>i</sup>Pr)<sub>2</sub> (**2b**)

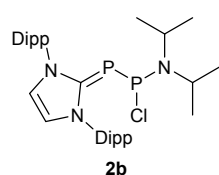

Dichloro(diisopropylamino)phosphane (130.6 mg, 0.646 mmol, 1 eq.) is dissolved in 0.5 mL of THF and a solution of DABCO (76 mg, 0.68 mmol, 1.05 eq.) in a minimum amount of THF is added. Upon addition of this solution to a pale yellow solution of DippNHC=PH (271.7 mg, 0.646 mmol, 1 eq.) in a minimum amount of THF, the colour changes to bright green and a colourless solid precipitates immediately. The crude reaction mixture is evaporated *in vacuo*, ca. 50 mL of dry hexane are added and the mixture is sonicated for 10 min yielding a greenish suspension.

Filtration over a PTFE syringe filter results in a bright yellow solution, which is evaporated *in vacuo* yielding  $\text{DippNHC=PPCl}(\text{N}^i\text{Pr}_2)$  (**2b**) as yellow solid (323 mg, 0.551 mmol, 85 %). Single crystals suitable for X-ray crystallography have been obtained by slow evaporation of a hexane solution of **2b**.

**$^1\text{H}$  NMR** (400 MHz,  $\text{C}_6\text{D}_6$ , 298 K)  $\delta$  = 7.24 (m, 2H, *p*-Ar), 7.13 (d,  $J_{\text{HH}}$  = 7.8 Hz, 4H, *m*-Ar), 6.28 (s, 2H,  $\text{CH}=\text{CH}$ ), 3.02 (sept.,  $J_{\text{HH}}$  = 6.8 Hz, 4H, Dipp- $\text{CH}(\text{CH}_3)_2$ ), 1.55 (d,  $J_{\text{HH}}$  = 6.8 Hz, 12H, Dipp- $\text{CHC}^a\text{H}_3\text{C}^b\text{H}_3$ ), 1.34—1.19 (m, 2H,  $\text{NCH}(\text{CH}_3)_2$ ), 1.10 (d,  $J_{\text{HH}}$  = 6.9 Hz, 12H, Dipp- $\text{CHC}^a\text{H}_3\text{C}^b\text{H}_3$ ), 1.06—0.92 (m, 12H,  $\text{NCH}(\text{CH}_3)_2$ );  **$^{13}\text{C}\{^1\text{H}\}$  NMR** (100.6 MHz,  $\text{C}_6\text{D}_6$ , 298 K)  $\delta$  = 171.6 (dd,  $J_{\text{PC}}$  = 110.4 Hz,  $J_{\text{PC}}$  = 31.3 Hz,  $\text{C}_{\text{carbene}}$ ), 146.6 (o-Dipp), 134.5 (d,  $J$  = 1.8 Hz, ipso-Dipp), 130.3 (p-Dipp), 124.5 (m-Dipp), 121.6 (d,  $J_{\text{PC}}$  = 3.2 Hz,  $\text{CH}=\text{CH}$ ), 28.9 (Dipp- $\text{CH}(\text{CH}_3)_2$ ), 24.7 (Dipp- $\text{CHC}^a\text{H}_3\text{C}^b\text{H}_3$ ), 23.2 (Dipp- $\text{CHC}^a\text{H}_3\text{C}^b\text{H}_3$ ), 22.7 ( $\text{NCH}(\text{CH}_3)_2$ ), not found: ( $\text{NCH}(\text{CH}_3)_2$ );  **$^{31}\text{P}\{^1\text{H}\}$  NMR** (162.0 MHz,  $\text{C}_6\text{D}_6$ , 298 K)  $\delta$  = 213.0 (d,  $J_{\text{PP}}$  = 337.0 Hz), -16.7 (d,  $J_{\text{PP}}$  = 336.1 Hz);  **$^{31}\text{P}\{^1\text{H}\}$  NMR** (202.5 MHz,  $\text{THF-d}_8$ , 298 K)  $\delta$  = 215.1 (d,  $J_{\text{PP}}$  = 342.2 Hz), -18.4 (d,  $J_{\text{PP}}$  = 342.1 Hz)

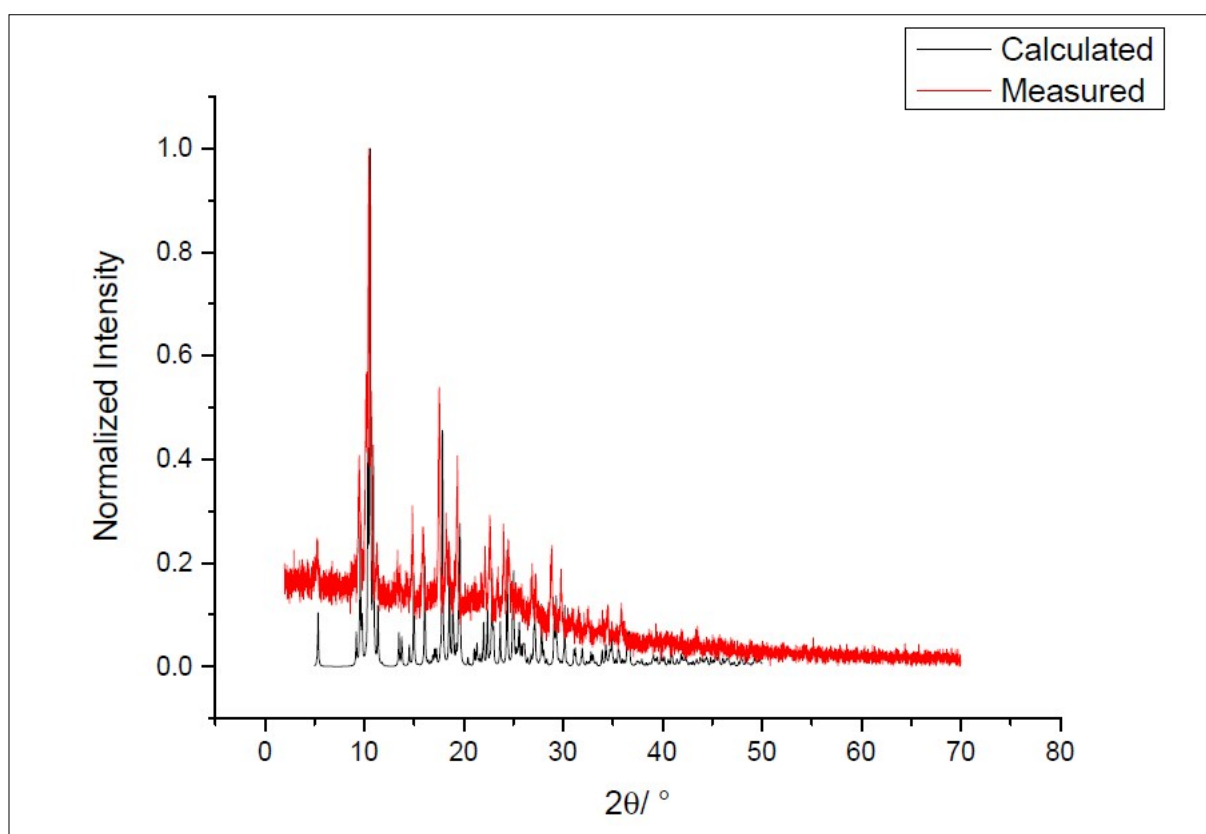

**Figure S 1** Calculated and measured powder diffractograms of **2b**

### Synthesis of <sup>Dipp</sup>NHC=PPhCl(NMe<sub>2</sub>) (**2c**)

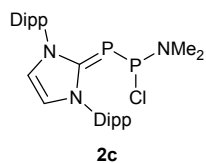

Chlorobis(dimethylamino)phosphane (257.6 mg, 1.67 mmol, 2.2 eq.) is dissolved in 2 mL of THF and a solution of DABCO (86.6 mg, 0.772 mmol, 1.01 eq.) in 2 mL of THF is added. While stirring at r.t., a solution of **1** (320.0 mg, 0.761 mmol, 1.0 eq.) in 10 mL of THF is added dropwise over 10 min. The solution turns from pale to intense yellow and a solid precipitates. After stirring the reaction mixture for 2 h at r.t., the solvent is removed *in vacuo*. An olive green mass is obtained, which is treated with dry hexane (2 × 100 mL) upon sonication. The yellow hexane solution is filtered off. Evaporation *in vacuo* gives **2c** as dirty orange crystalline solid (278.2 mg, 0.525 mmol, 69 %), which is used for further conversions.

We were not able to obtain a publishable structure of **2c**. However, for the calculation of a powder pattern a low quality molecular structure (data not shown) of **2c** has been used. The measured powder pattern shows good accordance with the calculated (Figure S 2).

**<sup>1</sup>H NMR** (400 MHz, THF-d<sub>8</sub>, 298 K) δ = 7.47 (t, *J*<sub>HH</sub> = 7.8 Hz, 2H, p-Dipp), 7.31 (d, *J*<sub>HH</sub> = 7.8 Hz, 4H, m-Dipp), 7.18 (s, 2H, CH=CH), 2.89 (sept., *J*<sub>HH</sub> = 6.9 Hz, 4H, Dipp-CH(CH<sub>3</sub>)<sub>2</sub>), 2.39 (d, *J*<sub>PH</sub> = 13.5 Hz, 6H, PN(CH<sub>3</sub>)<sub>2</sub>), 1.39 (d, *J*<sub>HH</sub> = 6.8 Hz, 12H, Dipp-CH<sub>3</sub>), 1.21 (d, *J*<sub>HH</sub> = 6.9 Hz, 12H, Dipp-C'H<sub>3</sub>); **<sup>13</sup>C{<sup>1</sup>H} NMR** (100.6 MHz, THF-d<sub>8</sub>, 298 K) δ = 170.7 (dd, *J*<sub>PC</sub> = 113.7 Hz, *J*<sub>PC</sub> = 24.6 Hz, C<sub>carbene</sub>), 147.1-146.2 (m, ipso-Dipp), 130.0 (p-Dipp), 134.2 (d, *J* = 3.3 Hz, o-Dipp), 124.1 (m-Dipp), 121.9 (d, *J*<sub>PC</sub> = 3.5 Hz, CH=CH), 40.3-39.7 (m, PN(CH<sub>3</sub>)<sub>2</sub>), 28.8 (Dipp-CH(CH<sub>3</sub>)<sub>2</sub>), 24.0 (Dipp-CHC'H<sub>3</sub>CH<sub>3</sub>), 22.2 (Dipp-CHC'H<sub>3</sub>CH<sub>3</sub>); **<sup>31</sup>P{<sup>1</sup>H} NMR** (162.0 MHz, THF-d<sub>8</sub>, 298 K) δ = 214.1 (d, *J*<sub>PP</sub> = 349.2 Hz), -33.5 (d, *J*<sub>PP</sub> = 351.0 Hz); **<sup>31</sup>P NMR** (162.0 MHz, THF-d<sub>8</sub>, 298 K) δ = 215.6-212.8 (m), -33.6 (d, *J*<sub>PP</sub> = 346.8 Hz)

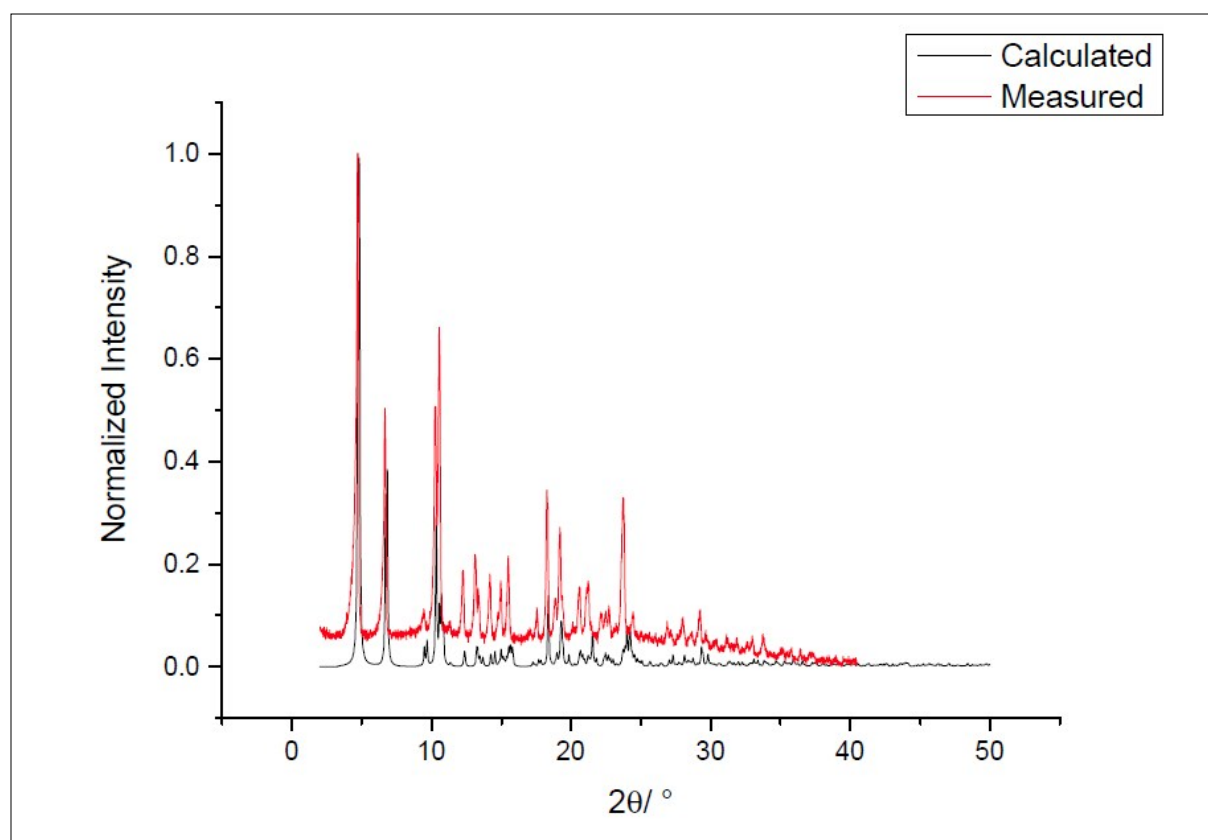

**Figure S 2** Calculated and measured powder diffractograms of **2c**

### 3. Cationic Derivatives

#### Mass and NMR Data of the Postulated [2+2] Cycloadduct (**3a**)<sub>2</sub>

DippNHC=PPClPh (**2a**) (14.7 mg, 0.026 mmol) and GaCl<sub>3</sub> (5.3 mg, 0.030 mmol, 1.15 eq.) are dissolved in 0.5 mL of purified THF-d<sub>8</sub>. A clear orange solution is obtained from which NMR spectra are recorded at a BRUKER 400 MHz spectrometer (**Figure S 3**). <sup>31</sup>P NMR (162.0 MHz, THF-d<sub>8</sub>, 298 K)  $\delta$  = -24.2 (t,  $J_{\text{PP}}$  = 111.9 Hz), -69.3 (t,  $J_{\text{PP}}$  = 112.1 Hz). A small triplet with  $J$  = 107.3 Hz and  $\delta$  = -66.0 ppm might be assigned to a stereoisomer of the described four membered ring (**3a**)<sub>2</sub> (of which the corresponding coupling triplet might be located under the strong triplet at  $\delta$  = -24.2 ppm), while signals around 48 and -126 ppm remain unassigned. MALDI-TOF data of a sample prepared similarly are depicted in **Figure S 4**. The postulation of this structure is also supported by the NMR data of (**3c**)<sub>2</sub> ( $\delta$  = 16.6 (t,  $J_{\text{PP}}$  = 163.3 Hz), -6.9 (t,  $J_{\text{PP}}$  = 162.9 Hz)), of which the structure is proven by single crystal X-ray diffraction (*vide infra*).

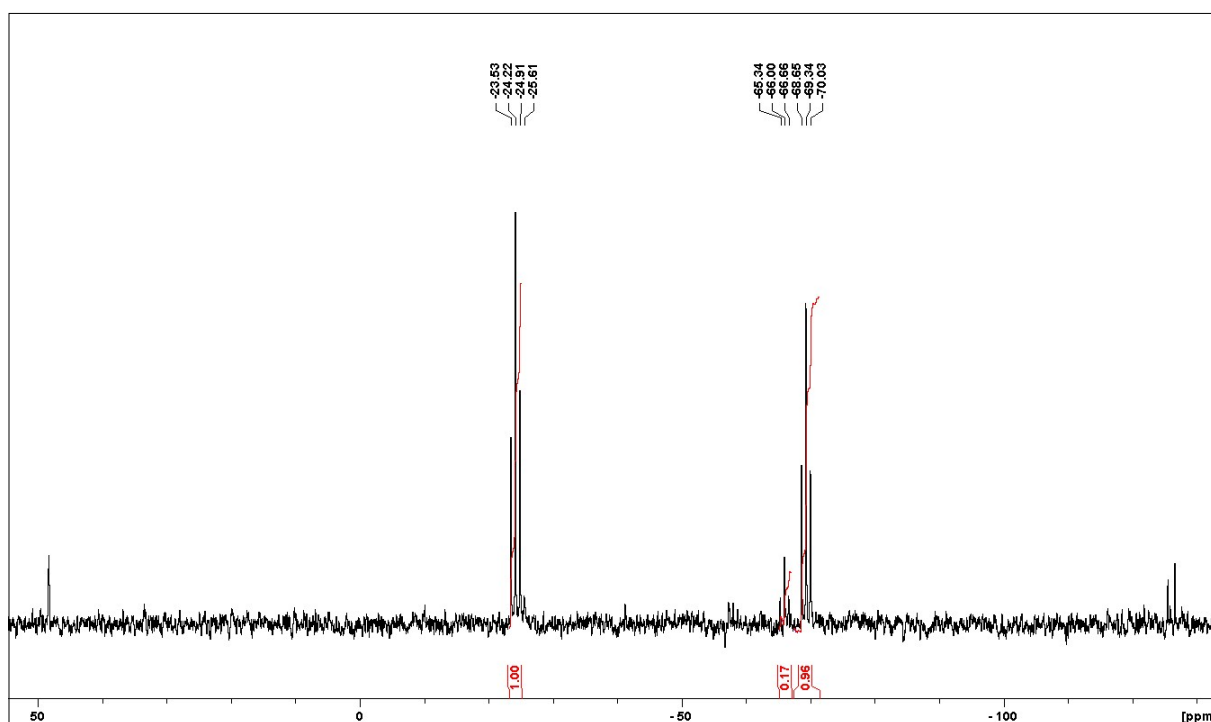

**Figure S 3** <sup>31</sup>P NMR spectrum of the postulated species (**3a**)<sub>2</sub>



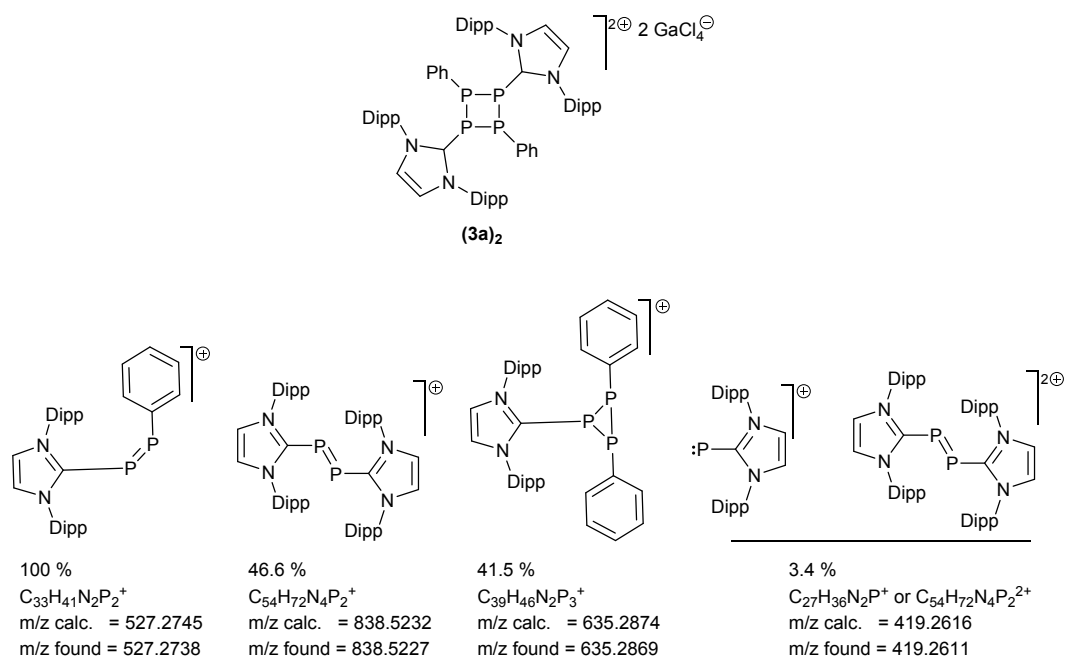

**Figure S 4** MALDI-TOF (positive mode) data of a sample prepared similarly to the method described above and assignment of the main signals

#### Synthesis of $DippNHC=PP(N^iPr_2)(GaCl_4)$ (**3b**)

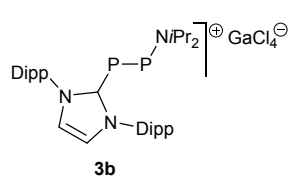

$Dipp_2NHC=PPCl(N^iPr_2)$  (38.3 mg, 0.07 mmol, 1 eq.) is dissolved in 1 mL of dry DME. Anhydrous  $GaCl_3$  (12.3 mg, 0.07 mmol, 1 eq.) in a minimum amount of hexane is added yielding a deep yellow solution.

By layering this solution with hexane, crystals suitable for single crystal X-ray crystallography have been obtained which have also been used for NMR spectroscopy. Yield has not been determined.

**$^1H$  NMR** (500 MHz, THF- $d_8$ , 298 K)  $\delta$  = 8.31 (s, 2H,  $CH=CH$ ), 7.68 (t,  $J_{HH}$  = 7.8 Hz, 2H, *p*-Ar), 7.52 (d,  $J_{HH}$  = 7.9 Hz, 4H, *m*-Ar), 4.70 – 3.76 (m, 2H,  $NCH(CH_3)_2$ ), 2.56 (sept.,  $J_{HH}$  = 6.8 Hz, 4H,  $Dipp-CH(CH_3)_2$ ), 1.34 (d,  $J_{HH}$  = 6.9 Hz, 12H,  $Dipp-CH_3$ ), 1.30 (d,  $J_{HH}$  = 6.9 Hz, 12H,  $Dipp-CH'_3$ ), 1.16 (d,  $J_{HH}$  = 6.6 Hz, 12H,  $NCH(CH_3)_2$ );  **$^{13}C\{^1H\}$  NMR** (125.8 MHz, THF- $d_8$ , 298 K)  $\delta$  = 145.4 (ipso-Ar), 132.2 (*p*-Ar), 131.8 (*o*-Ar), 128.1 ( $CH=CH$ ), 125.1 (*m*-Ar), 29.4 ( $Dipp-CH(CH_3)_2$ ), 25.9 ( $NCH(CH_3)CH'_3$ , only in HSQC), 24.3 ( $Dipp-CH_3$ ), 22.0 ( $Dipp-CH'_3$ ), 19.0 ( $NCH(CH_3)CH'_3$ , only in HSCQ), not found: ( $C_{carbene}$ ,  $NCH(CH_3)_2$ );  **$^{31}P\{^1H\}$  NMR** (202.5 MHz, THF- $d_8$ , 298 K)  $\delta$  = 492.1 (d,  $J_{PP}$  = 527.2 Hz), 158.1 (d,  $J_{PP}$  = 523.7 Hz)

## Synthesis of $(\text{DippNHC=PPNMe}_2)_2(\text{GaCl}_4)_2$ (**3c**)<sub>2</sub>

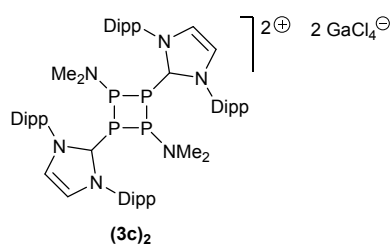

To the yellow solution of **2c** (40.9 mg, 0.077 mmol) in 1 mL of dry THF, a solution of  $\text{GaCl}_3$  (13.7 mg, 0.077 mmol, 1 eq.) in 0.7 mL of dry hexane is added. Upon evaporating the obtained milky reaction mixture *in vacuo*, a green foam is obtained, which is dissolved in 0.5 mL of dry DME. Covering

this solution with dry diisopropyl ether gives **(3c)**<sub>2</sub> as large colourless crystals (38.5 mg, 0.027 mmol, 70 %) suitable for X-ray diffraction.

**<sup>1</sup>H NMR** (500 MHz, THF-d<sub>8</sub>, 298 K)  $\delta$  = 8.18 (s, 4H, CH=CH), 7.75 (t,  $J_{\text{HH}}$  = 7.8 Hz, 4H, p-Dipp), 7.59 (d,  $J_{\text{HH}}$  = 7.9 Hz, 8H, m-Dipp), 2.51 (sept.,  $J_{\text{HH}}$  = 7.1 Hz, 8H, Dipp-CH(CH<sub>3</sub>)<sub>2</sub>), 2.30-1.60 (m, 12H, N(CH<sub>3</sub>)<sub>2</sub>), 1.44 (d,  $J_{\text{HH}}$  = 6.9 Hz, 24H, Dipp-CH<sub>3</sub>), 1.24 (d,  $J_{\text{HH}}$  = 6.8 Hz, 24H, Dipp-C'H<sub>3</sub>), **<sup>13</sup>C{<sup>1</sup>H} NMR** (125.8 MHz, THF-d<sub>8</sub>, 298 K)  $\delta$  = 145.0 (ipso-Dipp), 133.2 (p-Dipp), 130.6 (o-Dipp), 129.9 (CH=CH), 126.2 (m-Dipp), 29.7 (Dipp-CH(CH<sub>3</sub>)<sub>2</sub>), 24.7 (Dipp-CH(CH<sub>3</sub>)<sub>2</sub>), 22.1 (Dipp-CH(CH<sub>3</sub>)<sub>2</sub>), not found: N(CH<sub>3</sub>)<sub>2</sub>, C<sub>carbene</sub>; **<sup>31</sup>P{<sup>1</sup>H} NMR** (202.5 MHz, THF-d<sub>8</sub>, 298 K)  $\delta$  = 16.6 (t,  $J_{\text{PP}}$  = 163.3 Hz), -6.9 (t,  $J_{\text{PP}}$  = 162.9 Hz)

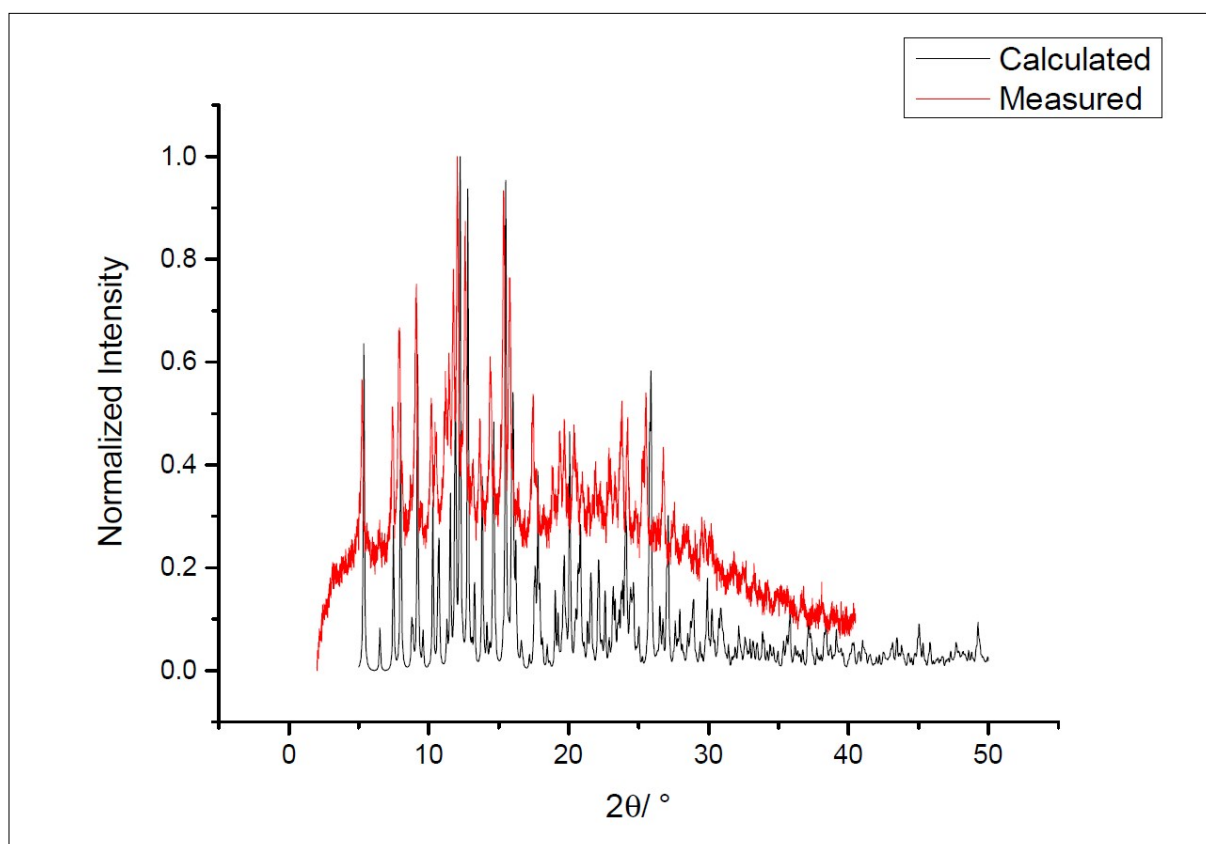

Figure S 5 Calculated and measured powder diffractograms of **(3c)**<sub>2</sub>

### Cycloreversion Reaction of **3c**<sub>2</sub> upon Heating

The 121.5 MHz <sup>31</sup>P NMR spectrum of a solution of (**3c**)<sub>2</sub> (7.0 mg, 0.005 mmol) and 2,3-dimethylbuta-1,3-diene (45 mg, 0.55 mmol, 220 eq. relative to the monomer) in 0.45 mL of THF in a J. YOUNG type NMR tube equipped with a sealed glass capillary containing 0.85 % D<sub>3</sub>PO<sub>4</sub> in D<sub>2</sub>O as external NMR standard is recorded. This spectrum (Figure S 6a) shows the signals reported for (**3c**)<sub>2</sub> (17.0 ppm, t, *J* = 165.5 Hz and -6.7 ppm, t, *J* = 164.5 Hz). Subsequently, the sample is heated to 60 °C for 20 h. The spectrum recorded afterwards (Figure S 6b) shows the NMR signals of the cycloadduct **4c** (65.5 ppm, d, *J* = 228.0 Hz and -41.8 ppm, d, *J* = 229.4 Hz, *vide infra*) indicating the full conversion of (**3c**)<sub>2</sub> to **4c**. This proves that (**3c**)<sub>2</sub> exists monomeric at elevated temperature.

All 121.5 MHz <sup>31</sup>P NMR spectra are recorded with 30 s relaxation delay and apodization is applied (a = 10 Hz).

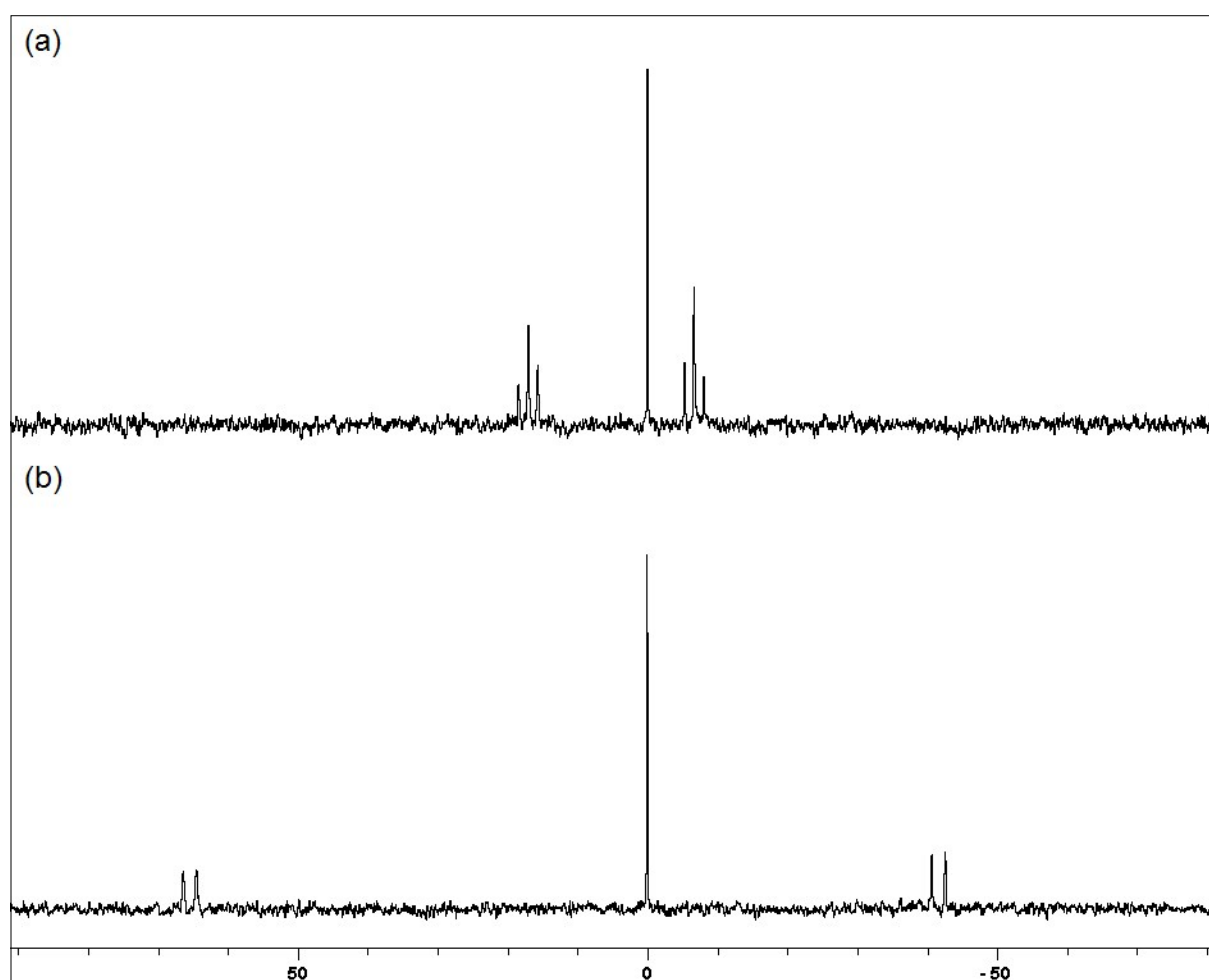

Figure S 6 <sup>31</sup>P NMR spectra showing the conversion of (**3c**)<sub>2</sub> into **4c** upon heating to 60 °C in the presence of 2,3-dimethylbuta-1,3-diene. The signal at 0 ppm is 0.85 % D<sub>3</sub>PO<sub>4</sub> in D<sub>2</sub>O as external NMR standard

#### 4. Cycloadducts with 2,3-Dimethylbuta-1,3-diene

##### Synthesis of Cycloadduct **4a**

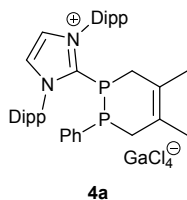

To the deep yellow solution of **2a** (51.6 mg, 0.092 mmol) and 2,3-dimethylbuta-1,3-diene (0.2 mL, ca. 2.4 mmol, ca. 26 eq.) in 3 mL of dry THF, GaCl<sub>3</sub> (17.4 mg, 0.099 mmol, 1.08 eq.) in 1 mL of dry hexane is added dropwise while stirring at r.t. After 30 min, the reaction mixture is evaporated *in vacuo* yielding an off-white foam, which is recrystallized twice from a DME solution layered with hexane. **4a** is isolated as off-white crystals suitable for X-ray crystallography (34.7 mg, 0.042 mmol, 46 %).

It is necessary to abstract the Cl atom in presence of the trapping agent as otherwise the *in situ* formed cation dimerises and therefore would not be accessible for a cycloaddition reaction with DMB.

**<sup>1</sup>H NMR** (500 MHz, CDCl<sub>3</sub>, 298 K)  $\delta$  = 7.84 (s, 2H, CH=CH), 7.47 (t,  $J_{\text{HH}}$  = 7.9 Hz, 2H, p-Dipp), 7.30-7.23 (m, 1H, Ph), 7.29 (dd,  $J_{\text{HH}}$  = 7.8 Hz,  $J_{\text{HH}}$  = 1.1 Hz, 2H, m-Dipp), 7.25 (dd,  $J_{\text{HH}}$  = 7.8 Hz,  $J_{\text{HH}}$  = 1.2 Hz, 2H, m'-Dipp), 7.16-7.11 (m, 2H, Ph), 6.99-6.93 (m, 2H, Ph), 2.58 (sept.,  $J_{\text{HH}}$  = 7.0 Hz, 2H, Dipp-CH(CH<sub>3</sub>)<sub>2</sub>), 2.51 (sept.,  $J_{\text{HH}}$  = 7.1 Hz, 2H, Dipp-CH(CH<sub>3</sub>)<sub>2</sub>), 2.24 (dt,  $J_{\text{HH}}$  = 14.4 Hz,  $J_{\text{HH}}$  = 6.7 Hz, 1H, C'HH), 2.03-1.92 (m, 2H, C'HH, CHH), 1.82 (td,  $J_{\text{HH}}$  = 11.9 Hz,  $J_{\text{HH}}$  = 3.5 Hz, 1H, CHH), 1.62 (bs, 3H, CH<sub>3</sub>), 1.37 (d,  $J_{\text{HH}}$  = 6.8 Hz, 6H, Dipp-CH<sub>3</sub>), 1.37 (d,  $J_{\text{HH}}$  = 6.8 Hz, 6H, Dipp-CH<sub>3</sub>), 1.28 (d,  $J_{\text{HH}}$  = 6.8 Hz, 6H, Dipp-CH<sub>3</sub>), 1.22 (d,  $J_{\text{HH}}$  = 6.8 Hz, 6H, Dipp-CH<sub>3</sub>), 1.19 (d, 3H,  $J_{\text{PH}}$  = 6.75 Hz, CH<sub>3</sub>); **<sup>13</sup>C{<sup>1</sup>H} NMR** (125.8 MHz, CDCl<sub>3</sub>, 298 K)  $\delta$  = 151.6 (dd,  $J_{\text{PC}}$  = 81.8 Hz,  $J_{\text{PC}}$  = 28.2 Hz, C<sub>carbene</sub>), 145.7 (ipso-Dipp), 145.1 (ipso-Dipp), 134.3 (dd,  $J_{\text{PC}}$  = 262 Hz,  $J_{\text{PC}}$  = 16 Hz, ipso-Ph), 132.8-132.5 (several signals, p-Dipp, Ph), 130.6 (o-Dipp), 129.3 (Ph), 128.6 (CH=CH), 128.0 (d,  $J_{\text{PH}}$  = 6.2 Hz, Ph), 125.0 (m-Dipp), 124.9 (m-Dipp), 33.0 (dd,  $J_{\text{PC}}$  = 29.6 Hz,  $J_{\text{PC}}$  = 3.8 Hz, C'HH), 29.7-29.5 (several signals, Dipp-CH(CH<sub>3</sub>)<sub>2</sub>), 26.2 (Dipp-CH(CH<sub>3</sub>)<sub>2</sub>), 25.7 (Dipp-CH(CH<sub>3</sub>)<sub>2</sub>), 24.1 (d,  $J_{\text{PC}}$  = 25.8 Hz, CHH), 22.4-22.2 (several signals, Dipp-CH(CH<sub>3</sub>)<sub>2</sub>), 21.6 (d,  $J_{\text{PC}}$  = 3.5 Hz, CH<sub>3</sub>), 18.5 (CH<sub>3</sub>); **<sup>31</sup>P{<sup>1</sup>H} NMR** (202.5 MHz, CDCl<sub>3</sub>, 298 K)  $\delta$  = -19.4 (d,  $J_{\text{PP}}$  = 211.4 Hz), -44.7 (d,  $J_{\text{PP}}$  = 211.7 Hz)

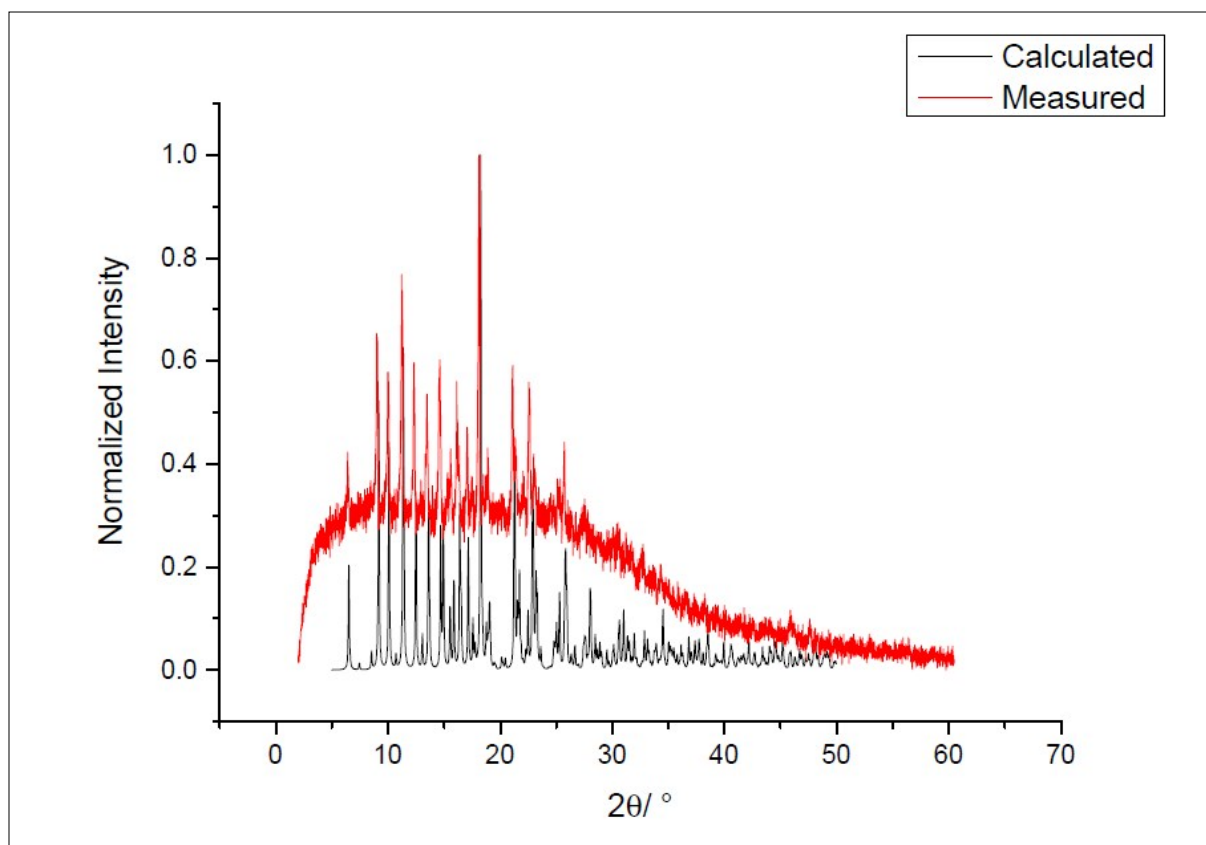

**Figure S 7** Calculated and measured powder diffractograms of **4a**

### Synthesis of Cycloadduct **4b**

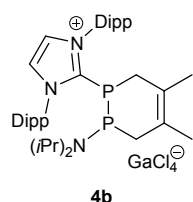

To the deep yellow solution of **2b** (196.7 mg, 0.336 mmol) and 2,3-dimethylbuta-1,3-diene (0.4 mL, ca. 10 eq.) in 4 mL of dry THF, GaCl<sub>3</sub> (59.2 mg, 0.336 mmol, 1.0 eq.) in a minimum amount of dry hexane is added while stirring. After concentrating the reaction mixture to one half, 10 mL of dry hexane are added yielding the precipitation of a solid and the formation of an oil. Subsequent evaporation of the whole batch *in vacuo* yields **4b** as a yellow solid (242.8 mg, 0.288 mmol, 86 %). Single crystals suitable for X-ray crystallography have been obtained from a solution of **4b** in DME layered with hexane at r.t.

**<sup>1</sup>H NMR** (500 MHz, CDCl<sub>3</sub>, 298 K)  $\delta$  = 7.90 (s, 2H, CH=CH), 7.63 (t,  $J_{\text{HH}}$  = 7.8 Hz, 2H, p-Dipp), 7.45 (dd,  $J_{\text{HH}}$  = 7.8 Hz,  $J_{\text{HH}}$  = 1.1 Hz, 2H, m-Dipp), 7.37 (dd,  $J_{\text{HH}}$  = 7.8 Hz,  $J_{\text{HH}}$  = 1.1 Hz, 2H, m'-Dipp), 3.06 (d sept.,  $J_{\text{PH}}$  = 11.8 Hz,  $J_{\text{HH}}$  = 6.4 Hz, 2H, N(CH(CH<sub>3</sub>)<sub>2</sub>)<sub>2</sub>), 2.57 (sept.,  $J_{\text{HH}}$  = 6.7 Hz, 2H, Dipp-CH(CH<sub>3</sub>)<sub>2</sub>), 2.36 (sept.,  $J_{\text{HH}}$  = 7.1 Hz, 2H, Dipp-CH(CH<sub>3</sub>)<sub>2</sub>), 2.30-2.22 (m, 2H, CHH, CHH), 2.00 (ddd,  $J$  = 14.8 Hz,  $J$  = 6.0 Hz,  $J$  = 3.0 Hz, 1H, C'HH), 1.73 (d, 3H,  $J_{\text{PH}}$  = 5.0 Hz, CH<sub>3</sub>), 1.69 (bs, 3H, CH<sub>3</sub>), 1.54 (d,  $J_{\text{HH}}$  = 6.8 Hz, 6H, Dipp-CH<sub>3</sub>), 1.32 (d,  $J_{\text{HH}}$  =

6.8 Hz, 6H, Dipp-CH<sub>3</sub>), 1.25 (d,  $J_{\text{HH}} = 6.5$  Hz, 6H, Dipp-CH<sub>3</sub>), 1.24 (d,  $J_{\text{HH}} = 6.6$  Hz, 6H, Dipp-CH<sub>3</sub>), 1.02 (d,  $J_{\text{HH}} = 6.6$  Hz, 6H, N(CH(CH<sub>3</sub>CH<sub>3</sub>))<sub>2</sub>), 0.95-0.87 (m, 1H, C'<sup>1</sup>HH), 0.83 (d,  $J_{\text{HH}} = 6.6$  Hz, 6H, N(CH(CH<sub>3</sub>CH<sub>3</sub>))<sub>2</sub>), some shifts and coupling constants from 300 MHz and 400 MHz spectra; <sup>13</sup>C{<sup>1</sup>H} NMR (125.8 MHz, CDCl<sub>3</sub>, 298 K)  $\delta$  = 150.9 (dd, ,  $J_{\text{PC}} = 85.1$  Hz,  $J_{\text{PC}} = 31.4$  Hz, C<sub>carbene</sub>), 145.7 (ipso-Dipp), 145.2 (ipso-Dipp), 133.1 (d,  $J_{\text{PC}} = 11.2$  Hz, CCH<sub>3</sub>=CH<sub>3</sub>C), 132.4 (p-Dipp), 131.6 (o-Dipp), 129.4 (d, CH=CH), 124.9 (m-Dipp), 124.6 (m'-Dipp), 121.1 (d,  $J_{\text{PC}} = 4.1$  Hz, CCH<sub>3</sub>=CCH<sub>3</sub>), 49.8-48.9 (m, N(CH(CH<sub>3</sub>CH<sub>3</sub>))<sub>2</sub>), 39.1 (d,  $J_{\text{PC}} = 37.1$  Hz, C'<sup>1</sup>HH), 27.9 (d,  $J_{\text{PC}} = 21.4$  Hz, CHH), 30.0-29.5 (several signals, Dipp-CH(CH<sub>3</sub>)<sub>2</sub>), 26.4 (Dipp-CH<sub>3</sub>), 26.2 (Dipp-CH<sub>3</sub>), 24.3 (d,  $J_{\text{PC}} = 4.4$  Hz, N(CH(CH<sub>3</sub>CH<sub>3</sub>))<sub>2</sub>), 22.8 (d,  $J_{\text{PC}} = 8.0$  Hz, N(CH(CH<sub>3</sub>CH<sub>3</sub>))<sub>2</sub>), 22.7-22.3 (several signals, Dipp-CH(CH<sub>3</sub>)<sub>2</sub>), 21.7 (d,  $J_{\text{PC}} = 2.5$  Hz, CH<sub>3</sub>), 19.5 (d,  $J_{\text{PC}} = 16.3$  Hz, CH<sub>3</sub>); <sup>31</sup>P{<sup>1</sup>H} NMR (202.5 MHz, CDCl<sub>3</sub>, 298 K)  $\delta$  = 32.9 (d,  $J_{\text{PP}} = 239.9$  Hz), -56.5 (d,  $J_{\text{PP}} = 238.7$  Hz); impurities observed in NMR

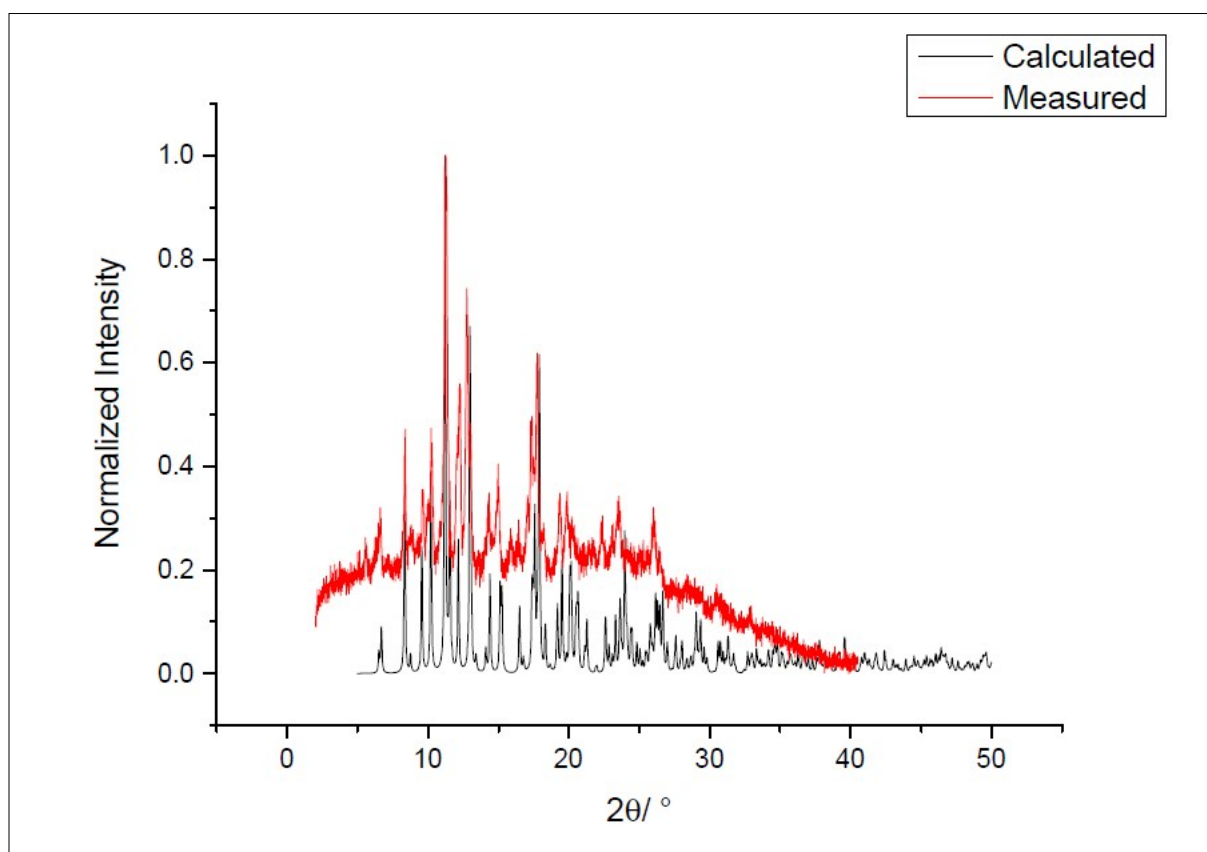

**Figure S 8** Calculated and measured powder diffractograms of **4b**

## Synthesis of Cycloadduct **4c**

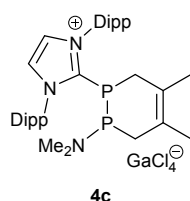

To a stirred solution of **2c** (86.4 mg, 0.163 mmol) and 2,3-dimethylbuta-1,3-diene (0.1 mL, ca. 0.9 mmol, ca. 5.5 eq.) in 3 mL of DME, a solution of GaCl<sub>3</sub> (29.2 mg, 0.166 mmol, 1.02 eq.) in 1.5 mL of hexane is added dropwise. After stirring for 30 min at r.t., the reaction mixture is evaporated *in vacuo*. The residue is dissolved in 5 mL of DME, filtered over a PTFE syringe filter, covered with 5 mL of hexane and left for crystallisation. **4c** is obtained as pale green crystals suitable for X-ray diffraction (52.5 mg, 0.067 mmol, 41 %).

**<sup>1</sup>H NMR** (400 MHz, CDCl<sub>3</sub>, 298 K)  $\delta$  = 7.76 (s, 2H, CH=CH), 7.64 (t,  $J_{\text{HH}}$  = 7.8 Hz, 2H, p-Dipp), 7.41 (d,  $J_{\text{HH}}$  = 7.8 Hz, 2H, m-Dipp), 7.38 (d,  $J_{\text{HH}}$  = 7.8 Hz, 2H, m'-Dipp), 2.56 (sept.,  $J_{\text{HH}}$  = 6.9 Hz, 2H, Dipp-CH(CH<sub>3</sub>)<sub>2</sub>), 2.48 (sept.,  $J_{\text{HH}}$  = 7.0 Hz, 2H, Dipp-CH(CH<sub>3</sub>)<sub>2</sub>), 2.29 (ddd,  $J_{\text{HH}}$  = 14.9 Hz,  $J_{\text{HH}}$  = 6.8 Hz,  $J_{\text{HH}}$  = 2.5 Hz, 1H, CHH), 2.16 (d,  $J_{\text{PH}}$  = 9.6 Hz, 6H, N(CH<sub>3</sub>)<sub>2</sub>), 2.02-1.91 (m, 1H, C'HH), 1.72 (d,  $J_{\text{PH}}$  = 6.3 Hz, 3H, CH<sub>3</sub>), 1.70-1.61 (m, 2H, CHH, C'HH), 1.58 (bs,  $J_{\text{PH}}$  = 6.3 Hz, 3H, CH<sub>3</sub>), 1.42 (d,  $J_{\text{HH}}$  = 6.8 Hz, 6H, Dipp-CH<sub>3</sub>), 1.38 (d,  $J_{\text{HH}}$  = 6.8 Hz, 6H, Dipp-CH<sub>3</sub>), 1.29 (d,  $J_{\text{HH}}$  = 6.8 Hz, 6H, Dipp-CH<sub>3</sub>), 1.23 (d,  $J_{\text{HH}}$  = 6.8 Hz, 6H, Dipp-CH<sub>3</sub>); **<sup>13</sup>C{<sup>1</sup>H} NMR** (100.6 MHz, CDCl<sub>3</sub>, 298 K)  $\delta$  = 152.1 (dd,  $J_{\text{PC}}$  = 83.9 Hz,  $J_{\text{PC}}$  = 30.0 Hz, C<sub>carbene</sub>), 145.7 (ipso-Dipp), 145.3 (ipso-Dipp), 133.3 (d,  $J_{\text{PC}}$  = 13.8 Hz, CCH<sub>3</sub>), 132.6 (p-Dipp), 131.1 (o-Dipp), 128.6 (bs, CH=CH), 125.1 (m-Dipp), 125.0 (m-Dipp), 121.8 (d,  $J_{\text{PC}}$  = 4.8 Hz, CCH<sub>3</sub>), 42.9 (dd,  $J_{\text{PC}}$  = 42.9 Hz,  $J_{\text{PC}}$  = 8.1 Hz, N(CH<sub>3</sub>)<sub>2</sub>), 37.1 (d,  $J_{\text{PC}}$  = 36.7 Hz, CHH), 29.7-29.5 (several signals, Dipp-CH(CH<sub>3</sub>)<sub>2</sub>), 26.0 (Dipp-CH(CH<sub>3</sub>)<sub>2</sub>), 25.6 (Dipp-CH(CH<sub>3</sub>)<sub>2</sub>), 24.9 (d,  $J_{\text{PC}}$  = 23.2 Hz, C'HH), 22.5-22.3 (m, Dipp-CH(CH<sub>3</sub>)<sub>2</sub>), 20.6 (d,  $J_{\text{PC}}$  = 3.7 Hz, CH<sub>3</sub>), 19.0 (d,  $J_{\text{PC}}$  = 2.3 Hz, CH<sub>3</sub>); **<sup>31</sup>P{<sup>1</sup>H} NMR** (162.0 MHz, CDCl<sub>3</sub>, 298 K)  $\delta$  = 65.4 (d,  $J_{\text{PP}}$  = 227.7 Hz), -41.2 (d,  $J_{\text{PP}}$  = 230.0 Hz)

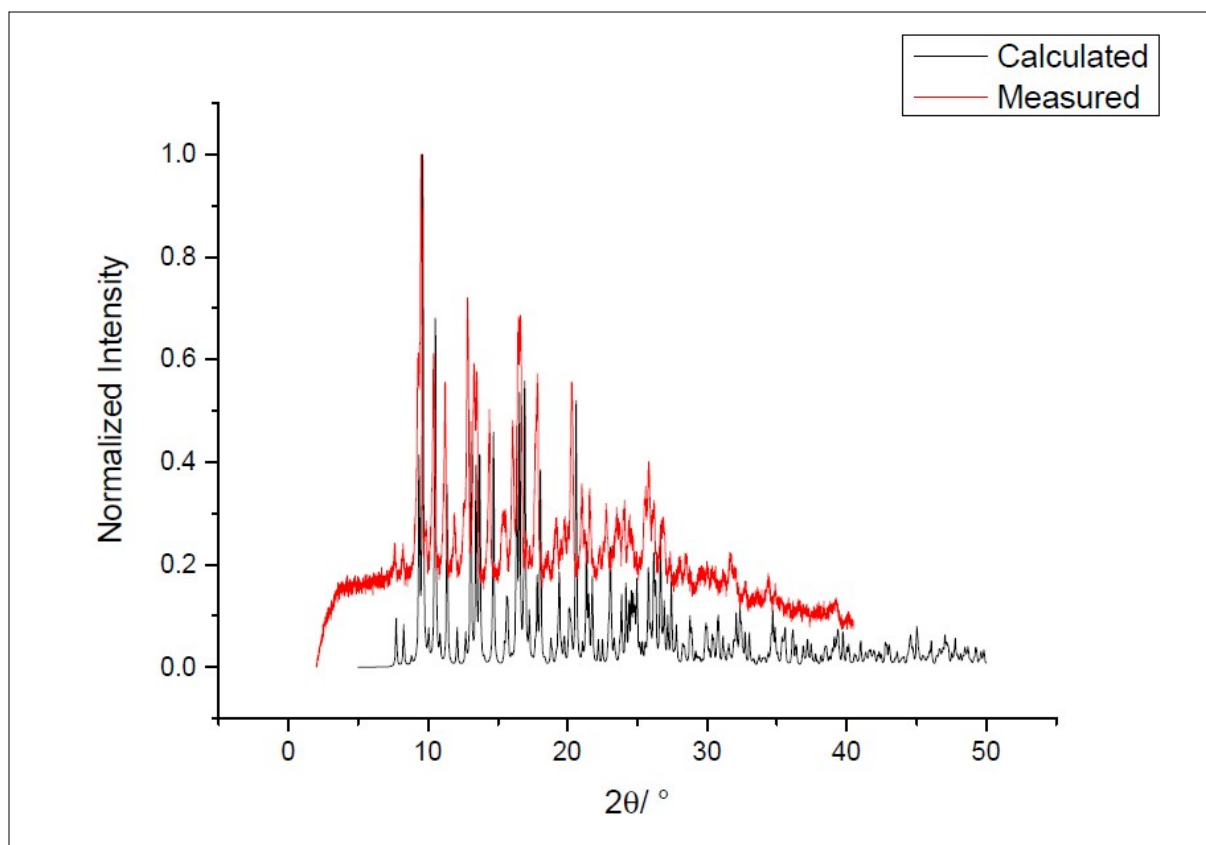

**Figure S 9** Calculated and measured powder diffractograms of **4c**

## 5. Cycloadducts with Cyclopentadiene

### Synthesis of Cycloadduct **5a**

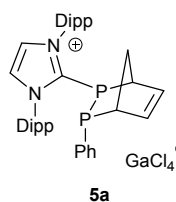

To a solution of **2a** (127.7 mg, 0.227 mmol) in a minimum amount of THF 0.5 mL of cyclopentadiene (ca. 27 eq.) are added followed by the addition of a solution of GaCl<sub>3</sub> (40.0 mg, 0.227 mmol, 1.0 eq.) in a minimum amount of hexane over 1 min while stirring at r.t. The obtained orange solution is evaporated *in vacuo* and dissolved in DCM. An unidentified solid is removed by syringe filtration. Covering the obtained yellow solution with hexane and subsequent cooling to -30 °C overnight yields **5a** as pale orange to colourless crystals suitable for x-ray crystallography (54.2 mg, 0.067 mmol, 30 %).

**<sup>1</sup>H NMR** (400 MHz, THF-d<sub>8</sub>, 298 K)  $\delta$  = 8.28 (s, 2H, NCH=CHN), 7.63 (t,  $J_{\text{HH}}$  = 7.8 Hz, 2H, p-Dipp), 7.58-7.52 (m, 2H, m-Dipp), 7.45-7.40 (m, 2H, m-Dipp), 7.29-7.23 (m, 1H, Ph), 7.18-7.11 (m, 2H, Ph), 6.95-6.88 (m, 2H, Ph), 5.78-5.71 (m, 1H, CCH=CHC), 5.62-5.56 (m, 1H, CCH=CHC), 3.82-3.69 (m, 1H, PCH), 2.92-2.85 (m, 1H, PC'H), 2.69 (sept.,  $J_{\text{HH}}$  = 6.8 Hz, 2H,



Dipp-CH(CH<sub>3</sub>)<sub>2</sub>), 2.57 (sept.,  $J_{\text{HH}} = 7.0$  Hz, 2H, Dipp-CH(CH<sub>3</sub>)<sub>2</sub>), 1.56 (d,  $J_{\text{HH}} = 6.8$  Hz, 6H, Dipp-CH<sub>3</sub>), 1.32 (d,  $J_{\text{HH}} = 6.9$  Hz, 6H, Dipp-CH<sub>3</sub>), 1.30 (d,  $J_{\text{HH}} = 7.0$  Hz, 6H, Dipp-CH<sub>3</sub>), 1.25 (d,  $J_{\text{HH}} = 6.9$  Hz, 6H, Dipp-CH<sub>3</sub>), not found: methylene-H, regions 1.93-1.77 ppm and 1.45-1.34 ppm show <sup>1</sup>H-<sup>13</sup>C-HSQC crosspeaks to CH<sub>2</sub>; <sup>13</sup>C{<sup>1</sup>H} NMR (100.6 MHz, THF-d<sub>8</sub>, 298 K)  $\delta = 145.9$  (ipso-Dipp), 145.1 (ipso-Dipp), 139.6 (d,  $J_{\text{PC}} = 12.3$  Hz, CC=CC), 133.2-132.7 (m, Ph), 132.6 (p-Dipp), 131.5 (o-Dipp), 129.2 (Ph), 128.6 (NCH=CHN), 127.8-127.6 (m, Ph), 125.4-124.7 (multiple signals, m-Dipp, CC=CC), 47.6 (d,  $J_{\text{PC}} = 14.8$  Hz, CH<sub>2</sub>), 46.3 (dd,  $J_{\text{PC}} = 26.9$  Hz,  $J_{\text{PC}} = 3.4$  Hz, PC'H), 43.7 (dd,  $J_{\text{PC}} = 27.5$  Hz,  $J_{\text{PC}} = 8.0$  Hz, PCH), 29.8-29.4 (several signals, CH(CH<sub>3</sub>)<sub>2</sub>), 25.3 (Dipp-CH<sub>3</sub>), 25.1 (Dipp-CH<sub>3</sub>), 21.6-21.4 (m, Dipp-CH<sub>3</sub>), 21.2 (Dipp-CH<sub>3</sub>), not found: C<sub>carbene</sub>, ipso-Ph; <sup>31</sup>P{<sup>1</sup>H} NMR (162.0 MHz, THF-d<sub>8</sub>, 298 K)  $\delta = -13.0$  (d,  $J_{\text{PP}} = 240.8$  Hz), -15.1 (d,  $J_{\text{PP}} = 242.2$  Hz); <sup>31</sup>P{<sup>1</sup>H} NMR (162.0 MHz, CD<sub>2</sub>Cl<sub>2</sub>, 298 K)  $\delta = -14.7$  (s); impurities observed in NMR

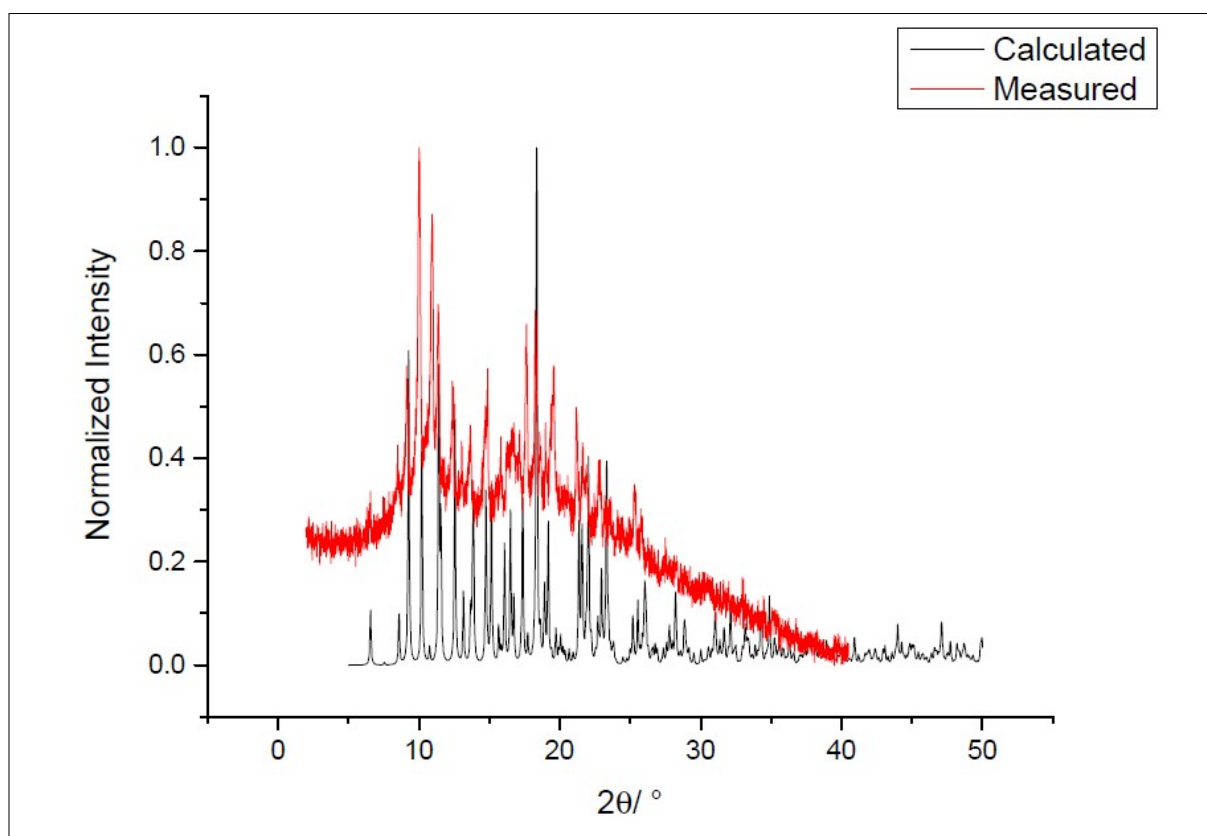

**Figure S 10** Calculated and measured powder diffractograms of **5a**

### The Reaction of **3b** with Cyclopentadiene – Proof of Reversibility

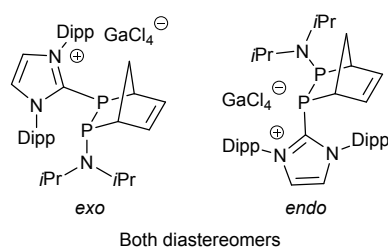

In an argon atmosphere, a solution of **2b** (18.8 mg, 0.032 mmol) in 0.5 mL of THF is added to a J. YOUNG type NMR tube containing dry  $\text{GaCl}_3$  (5.9 mg, 0.034 mmol, 1.06 eq.) yielding a deep orange clear solution. A sealed glass capillary containing 0.85 %  $\text{D}_3\text{PO}_4$  in  $\text{D}_2\text{O}$  is added as external

NMR standard. The 121.5 MHz  $^{31}\text{P}$  spectrum (**Figure S 11a**) of this solution shows the signals of **3b** (492.4 ppm, d,  $J = 520$  Hz and 158.3 ppm, d,  $J = 525$  Hz) and the singlet of phosphoric acid at 0 ppm.

Subsequently, cyclopentadiene (0.05 mL, 0.44 mmol, ca. 14 eq.) is added and spectra are recorded directly after the addition (**Figure S 11b**) and 12 h later (c). Both spectra now show two sets of signals in addition to trace signals of **3b** and phosphoric acid. These signals are assigned to the two diastereomers obtained in the [4+2] cycloaddition reaction between **3b** and cyclopentadiene (*cf.* shifts of other cycloaddition products): **5b** (42.5 ppm, d,  $J = 282$  Hz and -24.3 ppm, d,  $J = 289$  Hz) and **5b'** (35.7 ppm, d,  $J = 279$  Hz and -19.0 ppm, d,  $J = 278$  Hz). In the spectrum recorded immediately after the addition of cyclopentadiene, the signals of **5b'** are stronger than the signals of **5b**, while it is the other way round in the spectrum recorded 12 h later (**Figure S 12** shows a magnification). Hence, we assume that **5b'** is the kinetic product isomerising to the thermodynamic product **5b**.

Finally, the solution is carefully evaporated *in vacuo* forming an orange foam, which is left under rotary vane pump vacuum for 1 h. A final NMR spectrum is recorded after the dissolution of the foam in 0.5 mL of THF again showing the signals of **3b** besides traces of the cycloaddition products (**Figure S 11d**).

All 121.5 MHz  $^{31}\text{P}$  NMR spectra are recorded with 30 s relaxation delay and apodization is applied ( $a = 30$  Hz).

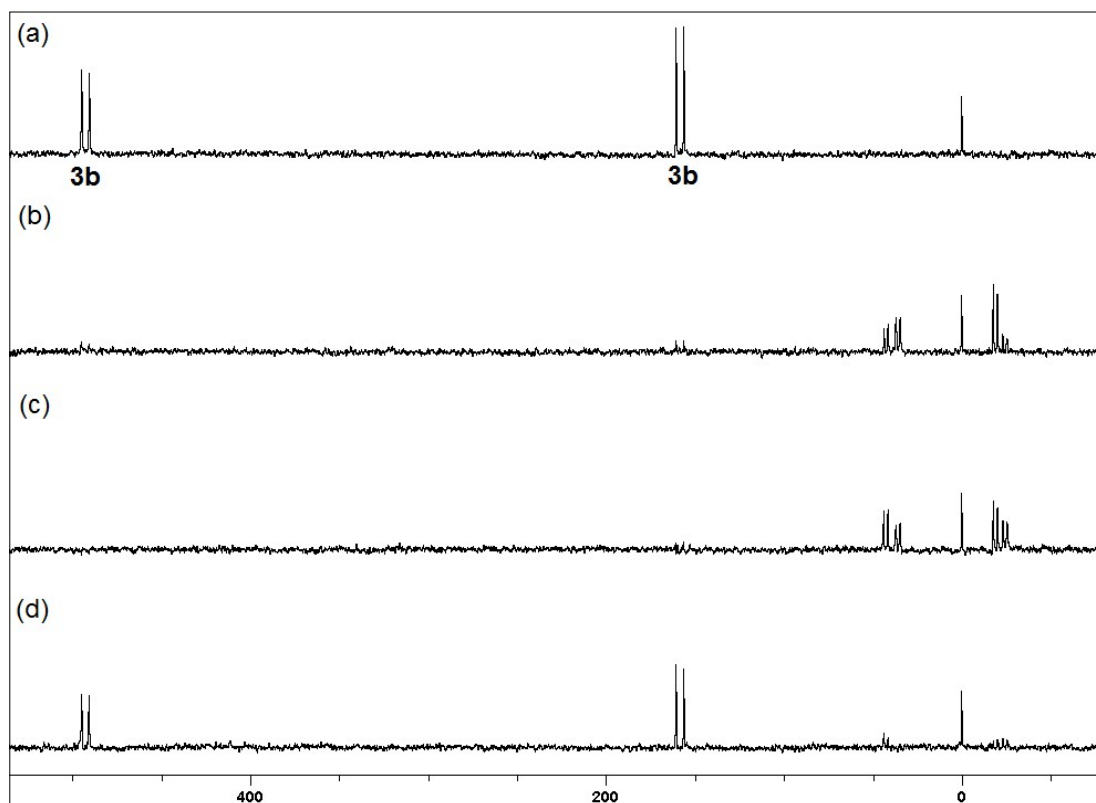

**Figure S 11**  $^{31}\text{P}$  NMR spectra showing the reversibility of the reaction of cation **3b** with cyclopentadiene. (a) without cyclopentadiene, (b) directly after the addition of cyclopentadiene, (c) 12 h later, (d) after evaporation *in vacuo* and dissolution in THF

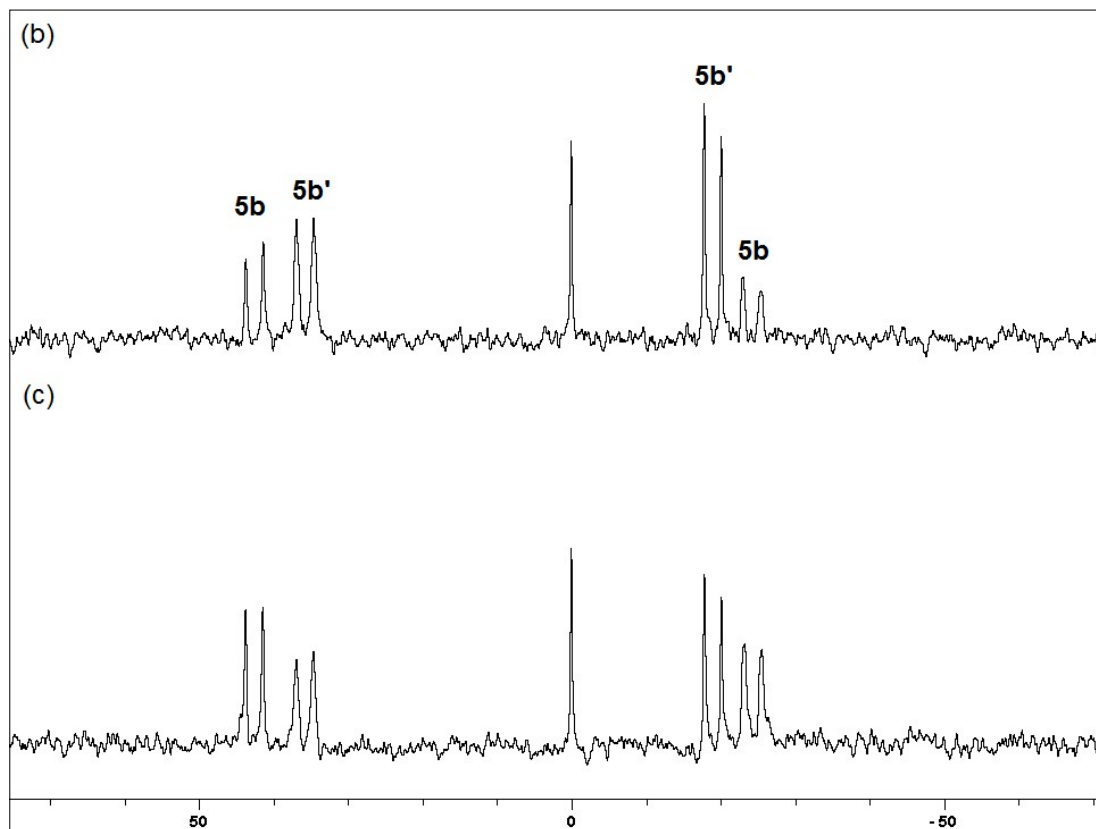

**Figure S 12** Detail of the  $^{31}\text{P}$  NMR spectrum shown in **Figure S 11**. Spectrum (b) measured directly after the addition of cyclopentadiene, spectrum (c) 12 h later. Two sets of signals are observed, which are assigned to cycloaddition products

## Synthesis of Cycloadduct **5c**

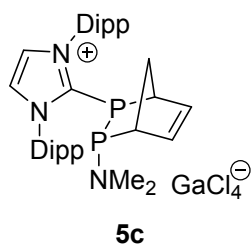

To a solution of **2c** (85.8 mg, 0.162 mmol) and 0.1 mL of cyclopentadiene (ca. 1.2 mmol, 7.5 eq.) in 2 mL of dry THF, a solution of GaCl<sub>3</sub> (29.9 mg, 0.170 mmol, 1.05 eq.) in 1 mL of dry hexane is slowly added while stirring. Upon evaporation *in vacuo*, an off-white foam is obtained, which is dissolved in a minimum amount of dry DME. Covering the filtered solution with dry hexane, **5c** is obtained as colourless crystals suitable for

XRD (19.1 mg, 0.025 mmol, 15 %). Note that **5c** is extremely sensitive to vacuum as cycloreversion reactions occur. This leads to major impurities, which are observed in NMR spectra (Figure S 14). Therefore, the assignment of NMR signals must be regarded as rough estimation in comparison with similar compounds.

**<sup>1</sup>H NMR** (500 MHz, CDCl<sub>3</sub>, 298 K)  $\delta$ /ppm = 7.74 (s, 2H, NCH=CHN), 7.67 (t,  $J_{\text{HH}}$  = 7.9 Hz, 2H, p-Dipp), 7.49-7.46 (m, 2H, m-Dipp), 7.42-7.37 (m, 2H, m-Dipp), 6.16-6.11 (m, 1H, CCH=CHC), 5.52-5.48 (m, 1H, CCH=CHC), 3.39-3.25 (m, 1H, PCH), 1.74-1.58 (m, 1H, PCH), 2.57-2.38 (m, Dipp-CH(CH<sub>3</sub>)<sub>2</sub>), 2.14-2.10 (m, 6H, N(CH<sub>3</sub>)<sub>2</sub>), 1.48 (d,  $J_{\text{HH}}$  = 6.8 Hz, 6H, Dipp-CH<sub>3</sub>), 1.35-1.18 (m, Dipp-CH<sub>3</sub>), 1.10-1.00 (m, 2H, CH<sub>2</sub>); **<sup>13</sup>C{<sup>1</sup>H} NMR** (125.8 MHz, CDCl<sub>3</sub>, 298 K)  $\delta$ /ppm = 146.0 (ipso-Dipp), 145.2 (ipso-Dipp), 137.9 (d,  $J_{\text{PC}}$  = 15.6 Hz, CC=CC), 132.6 (p-Dipp), 131.5 (o-Dipp), 128.3 (NCH=CHN), 125.7-124.9 (multiple signals, m-Dipp, CC=CC), 48.4 (d,  $J_{\text{PC}}$  = 39.1 Hz, PCH), 44.7-44.4 (m, CH<sub>2</sub>), 44.0 (dd,  $J_{\text{PC}}$  = 16.5 Hz,  $J_{\text{PC}}$  = 6.2 Hz, N(CH<sub>3</sub>)<sub>2</sub>), 29.9-29.2 (several signals, CH(CH<sub>3</sub>)<sub>2</sub>), 26.4-22.2 (several signals, Dipp-CH<sub>3</sub>), not found: C<sub>carbene</sub>, second PCH; **<sup>31</sup>P{<sup>1</sup>H} NMR** (162.0 MHz, CDCl<sub>3</sub>, 298 K)  $\delta$ /ppm = 66.5 (d,  $J_{\text{PP}}$  = 258.6 Hz), -25.2 (d,  $J_{\text{PP}}$  = 258.3 Hz), beside major impurities

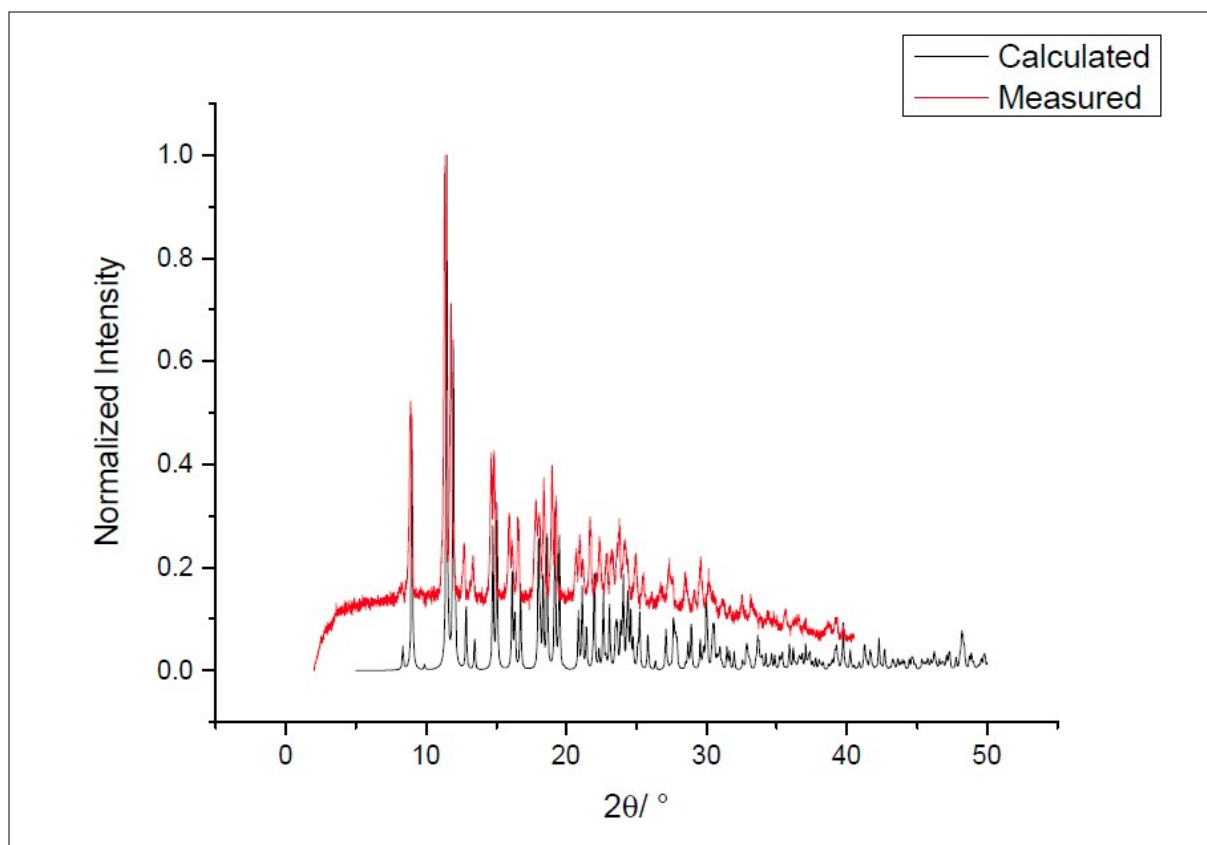

**Figure S 13** Calculated and measured powder diffractograms of **5c**

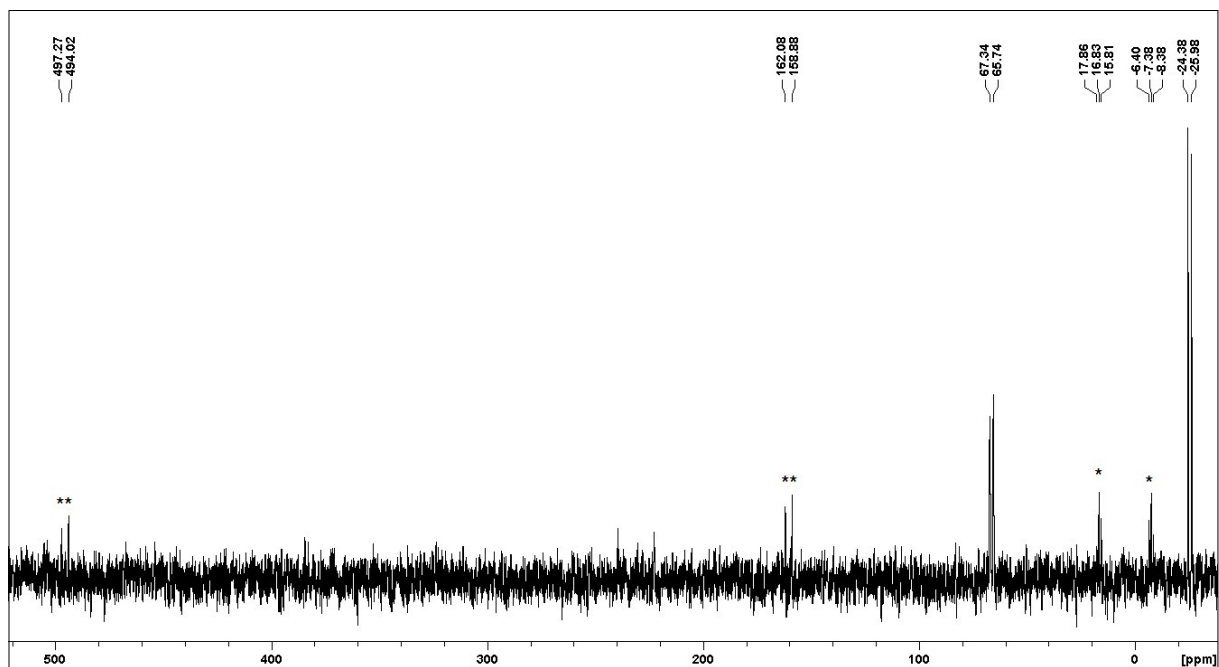

**Figure S 14** 162.0 MHz  $^{31}\text{P}\{^1\text{H}\}$  NMR spectrum of **5c**. Beside the signals of **5c**, signals assigned to  $(\mathbf{3c})_2$  (\*) and the monomeric cation **3c** (\*\*), which has not been observed otherwise, are detected

## Crystallographic Tables

|                                                                                   |    |
|-----------------------------------------------------------------------------------|----|
| Table S 1 Crystal data and structure refinement for <b>2a</b> .....               | 23 |
| Table S 2 Crystal data and structure refinement for <b>2b</b> .....               | 24 |
| Table S 3 Crystal data and structure refinement for <b>3b</b> .....               | 25 |
| Table S 4 Crystal data and structure refinement for <b>(3c)<sub>2</sub></b> ..... | 26 |
| Table S 5 Crystal data and structure refinement for <b>4a</b> .....               | 27 |
| Table S 6 Crystal data and structure refinement for <b>4b</b> .....               | 28 |
| Table S 7 Crystal data and structure refinement for <b>4c</b> .....               | 29 |
| Table S 8 Crystal data and structure refinement for <b>5a</b> .....               | 30 |
| Table S 9 Crystal data and structure refinement for <b>5c</b> .....               | 31 |

**Table S 1** Crystal data and structure refinement for **2a**

|                                             |                                                                  |
|---------------------------------------------|------------------------------------------------------------------|
| CCDC number                                 | 1415566                                                          |
| Empirical formula                           | C <sub>33</sub> H <sub>41</sub> N <sub>2</sub> P <sub>2</sub> Cl |
| Formula weight                              | 563.07                                                           |
| Temperature/K                               | 102.0                                                            |
| Crystal system                              | monoclinic                                                       |
| Space group                                 | P2 <sub>1</sub> /n                                               |
| a/Å                                         | 10.0682(3)                                                       |
| b/Å                                         | 12.4824(3)                                                       |
| c/Å                                         | 24.4361(6)                                                       |
| $\alpha$ /°                                 | 90                                                               |
| $\beta$ /°                                  | 93.0570(10)                                                      |
| $\gamma$ /°                                 | 90                                                               |
| Volume/Å <sup>3</sup>                       | 3066.64(14)                                                      |
| Z                                           | 4                                                                |
| $\rho_{\text{calc}}$ /cm <sup>3</sup>       | 1.220                                                            |
| $\mu$ /mm <sup>-1</sup>                     | 2.262                                                            |
| F(000)                                      | 1200.0                                                           |
| Crystal size/mm <sup>3</sup>                | 0.19 × 0.164 × 0.097                                             |
| Radiation                                   | CuK $\alpha$ ( $\lambda$ = 1.54178)                              |
| 2 $\Theta$ range for data collection/°      | 7.246 to 157.984                                                 |
| Index ranges                                | -12 ≤ h ≤ 12, -15 ≤ k ≤ 15, -31 ≤ l ≤ 31                         |
| Reflections collected                       | 65434                                                            |
| Independent reflections                     | 6607 [ $R_{\text{int}}$ = 0.0581, $R_{\text{sigma}}$ = 0.0270]   |
| Data/restraints/parameters                  | 6607/0/351                                                       |
| Goodness-of-fit on F <sup>2</sup>           | 1.074                                                            |
| Final R indexes [ $I \geq 2\sigma(I)$ ]     | $R_1$ = 0.0445, $wR_2$ = 0.1129                                  |
| Final R indexes [all data]                  | $R_1$ = 0.0513, $wR_2$ = 0.1175                                  |
| Largest diff. peak/hole / e Å <sup>-3</sup> | 0.53/-0.35                                                       |

**Table S 2** Crystal data and structure refinement for **2b**

|                                             |                                                                  |
|---------------------------------------------|------------------------------------------------------------------|
| CCDC                                        | 1415567                                                          |
| Empirical formula                           | C <sub>33</sub> H <sub>50</sub> N <sub>3</sub> P <sub>2</sub> Cl |
| Formula weight                              | 586.15                                                           |
| Temperature/K                               | 100.0                                                            |
| Crystal system                              | triclinic                                                        |
| Space group                                 | P-1                                                              |
| a/Å                                         | 10.4571(2)                                                       |
| b/Å                                         | 10.8862(2)                                                       |
| c/Å                                         | 16.6912(3)                                                       |
| $\alpha$ /°                                 | 83.6921(8)                                                       |
| $\beta$ /°                                  | 82.8084(8)                                                       |
| $\gamma$ /°                                 | 62.1884(8)                                                       |
| Volume/Å <sup>3</sup>                       | 1664.52(5)                                                       |
| Z                                           | 2                                                                |
| $\rho_{\text{calc}}$ /cm <sup>3</sup>       | 1.169                                                            |
| $\mu$ /mm <sup>-1</sup>                     | 0.236                                                            |
| F(000)                                      | 632.0                                                            |
| Crystal size/mm <sup>3</sup>                | 0.297 × 0.176 × 0.083                                            |
| Radiation                                   | MoK $\alpha$ ( $\lambda$ = 0.71073)                              |
| 2 $\Theta$ range for data collection/°      | 2.464 to 54.228                                                  |
| Index ranges                                | -13 ≤ h ≤ 13, -10 ≤ k ≤ 13, -21 ≤ l ≤ 21                         |
| Reflections collected                       | 25555                                                            |
| Independent reflections                     | 7359 [ $R_{\text{int}}$ = 0.0346, $R_{\text{sigma}}$ = 0.0483]   |
| Data/restraints/parameters                  | 7359/0/364                                                       |
| Goodness-of-fit on F <sup>2</sup>           | 1.032                                                            |
| Final R indexes [ $I \geq 2\sigma(I)$ ]     | $R_1$ = 0.0399, $wR_2$ = 0.0792                                  |
| Final R indexes [all data]                  | $R_1$ = 0.0592, $wR_2$ = 0.0867                                  |
| Largest diff. peak/hole / e Å <sup>-3</sup> | 0.37/-0.29                                                       |



**Table S 3** Crystal data and structure refinement for **3b**

|                                             |                                                                                 |
|---------------------------------------------|---------------------------------------------------------------------------------|
| CCDC                                        | 1415568                                                                         |
| Empirical formula                           | C <sub>33</sub> H <sub>50</sub> Cl <sub>4</sub> GaN <sub>3</sub> P <sub>2</sub> |
| Formula weight                              | 762.22                                                                          |
| Temperature/K                               | 100.0                                                                           |
| Crystal system                              | monoclinic                                                                      |
| Space group                                 | P2 <sub>1</sub> /c                                                              |
| a/Å                                         | 10.3933(8)                                                                      |
| b/Å                                         | 24.7035(17)                                                                     |
| c/Å                                         | 15.9464(12)                                                                     |
| α/°                                         | 90                                                                              |
| β/°                                         | 105.836(4)                                                                      |
| γ/°                                         | 90                                                                              |
| Volume/Å <sup>3</sup>                       | 3938.9(5)                                                                       |
| Z                                           | 4                                                                               |
| ρ <sub>calc</sub> /g/cm <sup>3</sup>        | 1.285                                                                           |
| μ/mm <sup>-1</sup>                          | 1.077                                                                           |
| F(000)                                      | 1592.0                                                                          |
| Crystal size/mm <sup>3</sup>                | 0.185 × 0.132 × 0.083                                                           |
| Radiation                                   | MoKα (λ = 0.71073)                                                              |
| 2Θ range for data collection/°              | 3.126 to 52.742                                                                 |
| Index ranges                                | -12 ≤ h ≤ 12, -30 ≤ k ≤ 30, -19 ≤ l ≤ 19                                        |
| Reflections collected                       | 51773                                                                           |
| Independent reflections                     | 8040 [R <sub>int</sub> = 0.0423, R <sub>sigma</sub> = 0.0319]                   |
| Data/restraints/parameters                  | 8040/0/421                                                                      |
| Goodness-of-fit on F <sup>2</sup>           | 1.025                                                                           |
| Final R indexes [I>=2σ (I)]                 | R <sub>1</sub> = 0.0343, wR <sub>2</sub> = 0.0708                               |
| Final R indexes [all data]                  | R <sub>1</sub> = 0.0511, wR <sub>2</sub> = 0.0769                               |
| Largest diff. peak/hole / e Å <sup>-3</sup> | 0.67/-0.54                                                                      |

**Table S 4** Crystal data and structure refinement for **(3c)<sub>2</sub>**

|                                             |                                                                                                              |
|---------------------------------------------|--------------------------------------------------------------------------------------------------------------|
| CCDC                                        | 1415569                                                                                                      |
| Empirical formula                           | C <sub>62</sub> H <sub>94</sub> Cl <sub>8</sub> Ga <sub>2</sub> N <sub>6</sub> O <sub>2</sub> P <sub>4</sub> |
| Formula weight                              | 1502.35                                                                                                      |
| Temperature/K                               | 100                                                                                                          |
| Crystal system                              | orthorhombic                                                                                                 |
| Space group                                 | Pbcn                                                                                                         |
| a/Å                                         | 32.9377(6)                                                                                                   |
| b/Å                                         | 23.6356(4)                                                                                                   |
| c/Å                                         | 19.1985(4)                                                                                                   |
| α/°                                         | 90                                                                                                           |
| β/°                                         | 90                                                                                                           |
| γ/°                                         | 90                                                                                                           |
| Volume/Å <sup>3</sup>                       | 14946.1(5)                                                                                                   |
| Z                                           | 8                                                                                                            |
| ρ <sub>calc</sub> /cm <sup>3</sup>          | 1.335                                                                                                        |
| μ/mm <sup>-1</sup>                          | 1.136                                                                                                        |
| F(000)                                      | 6256.0                                                                                                       |
| Crystal size/mm <sup>3</sup>                | 0.452 × 0.224 × 0.222                                                                                        |
| Radiation                                   | MoKα (λ = 0.71073)                                                                                           |
| 2Θ range for data collection/°              | 3.686 to 61.102                                                                                              |
| Index ranges                                | -47 ≤ h ≤ 38, -33 ≤ k ≤ 33, -27 ≤ l ≤ 13                                                                     |
| Reflections collected                       | 103106                                                                                                       |
| Independent reflections                     | 22865 [R <sub>int</sub> = 0.0493, R <sub>sigma</sub> = 0.0449]                                               |
| Data/restraints/parameters                  | 22865/155/895                                                                                                |
| Goodness-of-fit on F <sup>2</sup>           | 1.017                                                                                                        |
| Final R indexes [I >= 2σ (I)]               | R <sub>1</sub> = 0.0427, wR <sub>2</sub> = 0.0893                                                            |
| Final R indexes [all data]                  | R <sub>1</sub> = 0.0755, wR <sub>2</sub> = 0.1023                                                            |
| Largest diff. peak/hole / e Å <sup>-3</sup> | 0.51/-0.67                                                                                                   |

**Table S 5** Crystal data and structure refinement for **4a**

|                                             |                                                                                  |
|---------------------------------------------|----------------------------------------------------------------------------------|
| CCDC                                        | 1415570                                                                          |
| Empirical formula                           | C <sub>39</sub> H <sub>51</sub> N <sub>2</sub> P <sub>2</sub> Cl <sub>4</sub> Ga |
| Formula weight                              | 821.28                                                                           |
| Temperature/K                               | 101.1                                                                            |
| Crystal system                              | monoclinic                                                                       |
| Space group                                 | P2 <sub>1</sub> /c                                                               |
| a/Å                                         | 10.5864(5)                                                                       |
| b/Å                                         | 16.4856(8)                                                                       |
| c/Å                                         | 24.2540(11)                                                                      |
| α/°                                         | 90                                                                               |
| β/°                                         | 102.366(2)                                                                       |
| γ/°                                         | 90                                                                               |
| Volume/Å <sup>3</sup>                       | 4134.7(3)                                                                        |
| Z                                           | 4                                                                                |
| ρ <sub>calc</sub> /cm <sup>3</sup>          | 1.319                                                                            |
| μ/mm <sup>-1</sup>                          | 1.030                                                                            |
| F(000)                                      | 1712.0                                                                           |
| Crystal size/mm <sup>3</sup>                | 0.992 × 0.541 × 0.526                                                            |
| Radiation                                   | MoKα (λ = 0.71073)                                                               |
| 2Θ range for data collection/°              | 4.642 to 61.126                                                                  |
| Index ranges                                | -15 ≤ h ≤ 15, -23 ≤ k ≤ 23, -34 ≤ l ≤ 34                                         |
| Reflections collected                       | 78415                                                                            |
| Independent reflections                     | 12547 [R <sub>int</sub> = 0.0763, R <sub>sigma</sub> = 0.0426]                   |
| Data/restraints/parameters                  | 12547/0/443                                                                      |
| Goodness-of-fit on F <sup>2</sup>           | 1.081                                                                            |
| Final R indexes [I>=2σ (I)]                 | R <sub>1</sub> = 0.0432, wR <sub>2</sub> = 0.0859                                |
| Final R indexes [all data]                  | R <sub>1</sub> = 0.0592, wR <sub>2</sub> = 0.0917                                |
| Largest diff. peak/hole / e Å <sup>-3</sup> | 0.83/-0.49                                                                       |

**Table S 6** Crystal data and structure refinement for **4b**

|                                             |                                                                                  |
|---------------------------------------------|----------------------------------------------------------------------------------|
| CCDC                                        | 1415571                                                                          |
| Empirical formula                           | C <sub>39</sub> H <sub>60</sub> N <sub>3</sub> P <sub>2</sub> Cl <sub>4</sub> Ga |
| Formula weight                              | 844.36                                                                           |
| Temperature/K                               | 100                                                                              |
| Crystal system                              | monoclinic                                                                       |
| Space group                                 | P2 <sub>1</sub> /c                                                               |
| a/Å                                         | 10.7703(2)                                                                       |
| b/Å                                         | 15.0762(3)                                                                       |
| c/Å                                         | 27.5758(5)                                                                       |
| α/°                                         | 90                                                                               |
| β/°                                         | 101.0720(10)                                                                     |
| γ/°                                         | 90                                                                               |
| Volume/Å <sup>3</sup>                       | 4394.28(14)                                                                      |
| Z                                           | 4                                                                                |
| ρ <sub>calc</sub> /cm <sup>3</sup>          | 1.276                                                                            |
| μ/mm <sup>-1</sup>                          | 0.972                                                                            |
| F(000)                                      | 1776.0                                                                           |
| Crystal size/mm <sup>3</sup>                | 0.297 × 0.255 × 0.15                                                             |
| Radiation                                   | MoKα (λ = 0.71073)                                                               |
| 2Θ range for data collection/°              | 4.044 to 52.744                                                                  |
| Index ranges                                | -13 ≤ h ≤ 5, -18 ≤ k ≤ 18, -34 ≤ l ≤ 34                                          |
| Reflections collected                       | 34737                                                                            |
| Independent reflections                     | 8936 [R <sub>int</sub> = 0.0272, R <sub>sigma</sub> = 0.0290]                    |
| Data/restraints/parameters                  | 8936/0/461                                                                       |
| Goodness-of-fit on F <sup>2</sup>           | 1.037                                                                            |
| Final R indexes [I>=2σ (I)]                 | R <sub>1</sub> = 0.0363, wR <sub>2</sub> = 0.0908                                |
| Final R indexes [all data]                  | R <sub>1</sub> = 0.0487, wR <sub>2</sub> = 0.0981                                |
| Largest diff. peak/hole / e Å <sup>-3</sup> | 0.85/-0.37                                                                       |

**Table S 7** Crystal data and structure refinement for **4c**

|                                                |                                                                                  |
|------------------------------------------------|----------------------------------------------------------------------------------|
| CCDC                                           | 1415572                                                                          |
| Empirical formula                              | C <sub>35</sub> H <sub>52</sub> N <sub>3</sub> P <sub>2</sub> Cl <sub>4</sub> Ga |
| Formula weight                                 | 788.25                                                                           |
| Temperature/K                                  | 100                                                                              |
| Crystal system                                 | orthorhombic                                                                     |
| Space group                                    | Pbca                                                                             |
| a/Å                                            | 20.036(3)                                                                        |
| b/Å                                            | 18.337(2)                                                                        |
| c/Å                                            | 21.409(3)                                                                        |
| $\alpha/^\circ$                                | 90                                                                               |
| $\beta/^\circ$                                 | 90                                                                               |
| $\gamma/^\circ$                                | 90                                                                               |
| Volume/Å <sup>3</sup>                          | 7865.6(18)                                                                       |
| Z                                              | 8                                                                                |
| $\rho_{\text{calc}}/\text{g}/\text{cm}^3$      | 1.331                                                                            |
| $\mu/\text{mm}^{-1}$                           | 1.081                                                                            |
| F(000)                                         | 3296.0                                                                           |
| Crystal size/mm <sup>3</sup>                   | 0.396 × 0.32 × 0.264                                                             |
| Radiation                                      | MoK $\alpha$ ( $\lambda$ = 0.71073)                                              |
| 2 $\Theta$ range for data collection/ $^\circ$ | 3.562 to 58.374                                                                  |
| Index ranges                                   | -27 ≤ h ≤ 27, -24 ≤ k ≤ 20, -29 ≤ l ≤ 29                                         |
| Reflections collected                          | 55940                                                                            |
| Independent reflections                        | 10591 [ $R_{\text{int}}$ = 0.0281, $R_{\text{sigma}}$ = 0.0224]                  |
| Data/restraints/parameters                     | 10591/18/464                                                                     |
| Goodness-of-fit on F <sup>2</sup>              | 1.199                                                                            |
| Final R indexes [ $I \geq 2\sigma(I)$ ]        | $R_1$ = 0.0411, $wR_2$ = 0.1456                                                  |
| Final R indexes [all data]                     | $R_1$ = 0.0504, $wR_2$ = 0.1520                                                  |
| Largest diff. peak/hole / e Å <sup>-3</sup>    | 0.85/-0.52                                                                       |

**Table S 8** Crystal data and structure refinement for **5a**

|                                             |                                                                                    |
|---------------------------------------------|------------------------------------------------------------------------------------|
| CCDC                                        | 1415573                                                                            |
| Empirical formula                           | C <sub>38</sub> H <sub>47</sub> Cl <sub>4</sub> GaN <sub>2</sub> P <sub>2.07</sub> |
| Formula weight                              | 807.32                                                                             |
| Temperature/K                               | 100                                                                                |
| Crystal system                              | monoclinic                                                                         |
| Space group                                 | P2 <sub>1</sub> /c                                                                 |
| a/Å                                         | 10.4962(7)                                                                         |
| b/Å                                         | 16.4244(11)                                                                        |
| c/Å                                         | 23.8724(15)                                                                        |
| α/°                                         | 90                                                                                 |
| β/°                                         | 101.7157(11)                                                                       |
| γ/°                                         | 90                                                                                 |
| Volume/Å <sup>3</sup>                       | 4029.7(5)                                                                          |
| Z                                           | 4                                                                                  |
| ρ <sub>calc</sub> /cm <sup>3</sup>          | 1.331                                                                              |
| μ/mm <sup>-1</sup>                          | 1.059                                                                              |
| F(000)                                      | 1676.0                                                                             |
| Crystal size/mm <sup>3</sup>                | 0.49 × 0.34 × 0.2                                                                  |
| Radiation                                   | MoKα (λ = 0.71073)                                                                 |
| 2Θ range for data collection/°              | 3.03 to 58.438                                                                     |
| Index ranges                                | -14 ≤ h ≤ 14, -22 ≤ k ≤ 22, -32 ≤ l ≤ 32                                           |
| Reflections collected                       | 44260                                                                              |
| Independent reflections                     | 10899 [R <sub>int</sub> = 0.0312, R <sub>sigma</sub> = 0.0287]                     |
| Data/restraints/parameters                  | 10899/0/440                                                                        |
| Goodness-of-fit on F <sup>2</sup>           | 1.046                                                                              |
| Final R indexes [I>=2σ (I)]                 | R <sub>1</sub> = 0.0371, wR <sub>2</sub> = 0.0915                                  |
| Final R indexes [all data]                  | R <sub>1</sub> = 0.0472, wR <sub>2</sub> = 0.0970                                  |
| Largest diff. peak/hole / e Å <sup>-3</sup> | 0.72/-0.40                                                                         |

**Table S 9** Crystal data and structure refinement for **5c**

|                   |                                                                                  |
|-------------------|----------------------------------------------------------------------------------|
| CCDC              | 1415574                                                                          |
| Empirical formula | C <sub>34</sub> H <sub>48</sub> N <sub>3</sub> P <sub>2</sub> Cl <sub>4</sub> Ga |

|                                                |                                                                 |
|------------------------------------------------|-----------------------------------------------------------------|
| Formula weight                                 | 772.21                                                          |
| Temperature/K                                  | 100                                                             |
| Crystal system                                 | monoclinic                                                      |
| Space group                                    | Cc                                                              |
| a/Å                                            | 19.7393(3)                                                      |
| b/Å                                            | 13.1426(2)                                                      |
| c/Å                                            | 16.1564(2)                                                      |
| $\alpha/^\circ$                                | 90                                                              |
| $\beta/^\circ$                                 | 115.0700(10)                                                    |
| $\gamma/^\circ$                                | 90                                                              |
| Volume/Å <sup>3</sup>                          | 3796.52(10)                                                     |
| Z                                              | 4                                                               |
| $\rho_{\text{calc}}/\text{g}/\text{cm}^3$      | 1.351                                                           |
| $\mu/\text{mm}^{-1}$                           | 1.118                                                           |
| F(000)                                         | 1608.0                                                          |
| Crystal size/mm <sup>3</sup>                   | 0.331 × 0.125 × 0.094                                           |
| Radiation                                      | MoK $\alpha$ ( $\lambda$ = 0.71073)                             |
| 2 $\Theta$ range for data collection/ $^\circ$ | 3.846 to 66.186                                                 |
| Index ranges                                   | -30 ≤ h ≤ 30, -19 ≤ k ≤ 20, -23 ≤ l ≤ 22                        |
| Reflections collected                          | 24678                                                           |
| Independent reflections                        | 11114 [ $R_{\text{int}}$ = 0.0340, $R_{\text{sigma}}$ = 0.0684] |
| Data/restraints/parameters                     | 11114/28/431                                                    |
| Goodness-of-fit on F <sup>2</sup>              | 0.953                                                           |
| Final R indexes [ $I \geq 2\sigma(I)$ ]        | $R_1$ = 0.0371, $wR_2$ = 0.0731                                 |
| Final R indexes [all data]                     | $R_1$ = 0.0464, $wR_2$ = 0.0764                                 |
| Largest diff. peak/hole / e Å <sup>-3</sup>    | 0.75/-0.29                                                      |

## References

1. A. M. Tondreau, Z. Benko, J. R. Harmer and H. Grützmacher, *Chemical Science*, 2014, **5**, 1545-1554.
2. F. F. Puschmann, D. Stein, D. Heift, C. Hendriksen, Z. A. Gal, H.-F. Grützmacher and H. Grützmacher, *Angewandte Chemie International Edition*, 2011, **50**, 8420-8423.
3. D. Heift, Z. Benko and H. Grützmacher, *Dalton Transactions*, 2014, **43**, 831-840.

4. P. Tang, W. Wang and T. Ritter, *Journal of the American Chemical Society*, 2011, **133**, 11482-11484.
5. E. J. Nurminen, J. K. Mattinen and H. Lonnberg, *Journal of the Chemical Society, Perkin Transactions 2*, 1998, DOI: 10.1039/A801250D, 1621-1628.
6. U. Berens, U. Englert, S. Geyser, J. Runsink and A. Salzer, *European Journal of Organic Chemistry*, 2006, **2006**, 2100-2109.
7. O. V. Dolomanov, L. J. Bourhis, R. J. Gildea, J. A. K. Howard and H. Puschmann, *Journal of Applied Crystallography*, 2009, **42**, 339-341.
